# Supplementary material for: Design, synthesis, anticancer activity and mechanism studies of novel 2-amino-4-aryl-pyrimidine derivatives of ursolic acid
Source: Royal Society of Chemistry journal article supplement (doi:10.1039/d1nj05294b), 2022-01-01
Supplement: d1nj05294b1.pdf [file d1nj05294b1.pdf]

**Design, synthesis, anticancer activity and mechanism studies  
of novel 2-amino-4-aryl-pyrimidine derivatives of ursolic  
acid**

Wen-Yan Wang,<sup>a</sup> Zi-Hui Yang,<sup>a</sup> A-Liang Li,<sup>a</sup> Qing-Song Liu,<sup>a</sup> Yue Sun,<sup>a</sup>

Wen Gu<sup>\*a</sup>

**Fig. S1~Fig. S78. <sup>1</sup>H NMR, <sup>13</sup>C NMR and HRMS spectra of  
compounds 6a-j, 7a-j and 9a-f.**

---

<sup>a</sup> Jiangsu Provincial Key Lab for the Chemistry and Utilization of Agro-forest Biomass, Jiangsu Key Lab of Biomass-based Green Fuels and Chemicals, Co-Innovation Center for Efficient Processing and Utilization of Forest Products, College of Chemical Engineering, Nanjing Forestry University, Nanjing 210037, P. R. China.  
E-mail address: njguwen@163.com.

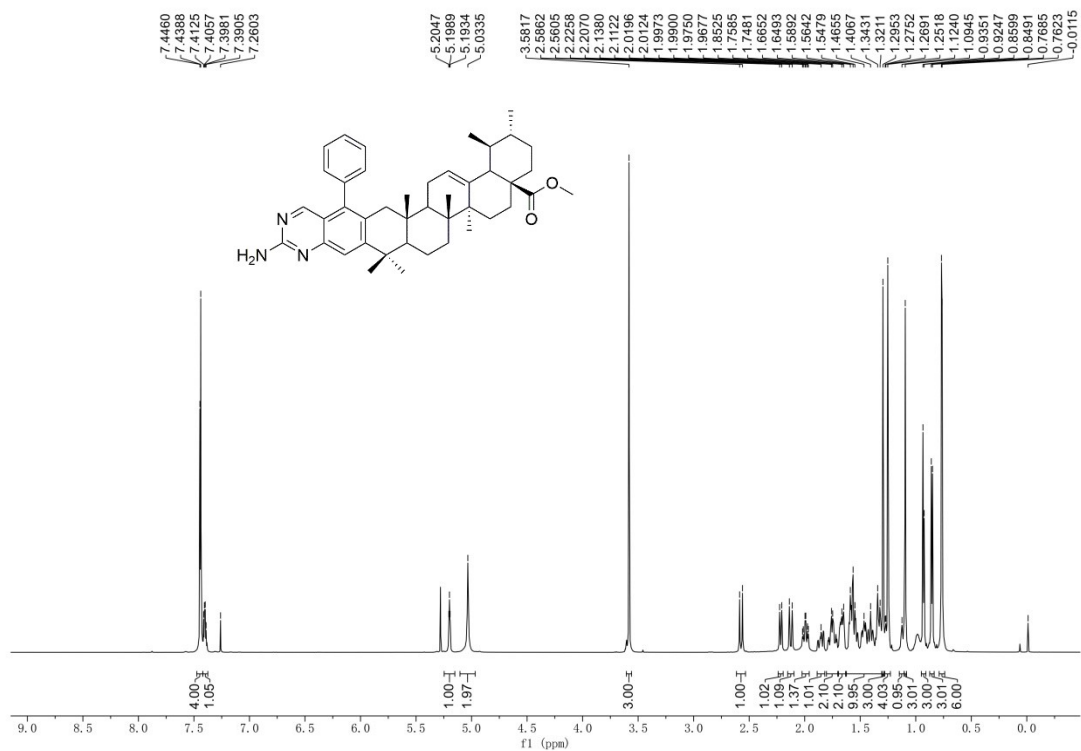

**Fig. S1.** <sup>1</sup>H NMR spectrum of compound 6a (600 MHz, CDCl<sub>3</sub>)

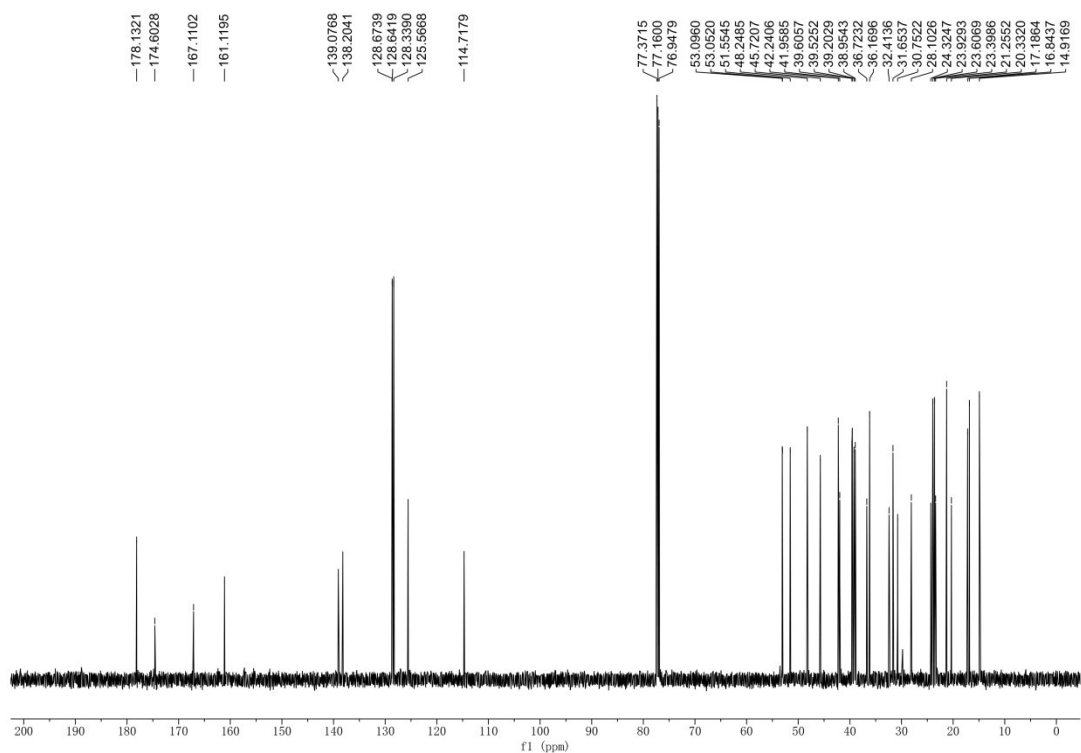

**Fig. S2.** <sup>13</sup>C NMR spectrum of compound 6a (150 MHz, CDCl<sub>3</sub>)

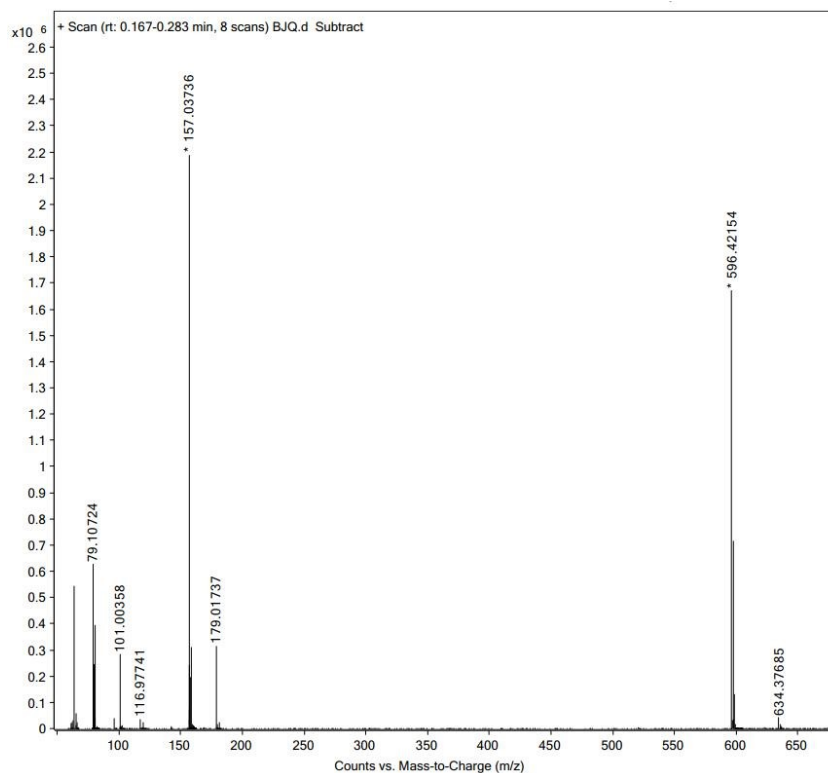

**Fig. S3. HRMS spectrum of compound 6a**

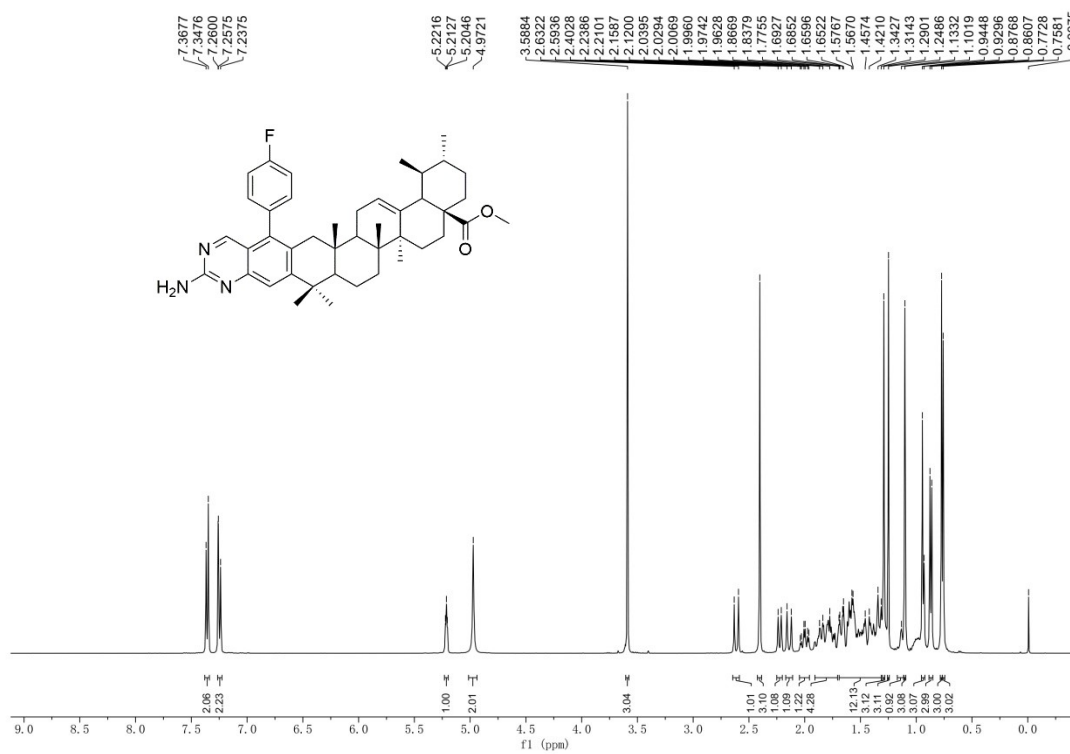

**Fig. S4. <sup>1</sup>H NMR spectrum of compound 6b (600 MHz, CDCl<sub>3</sub>)**

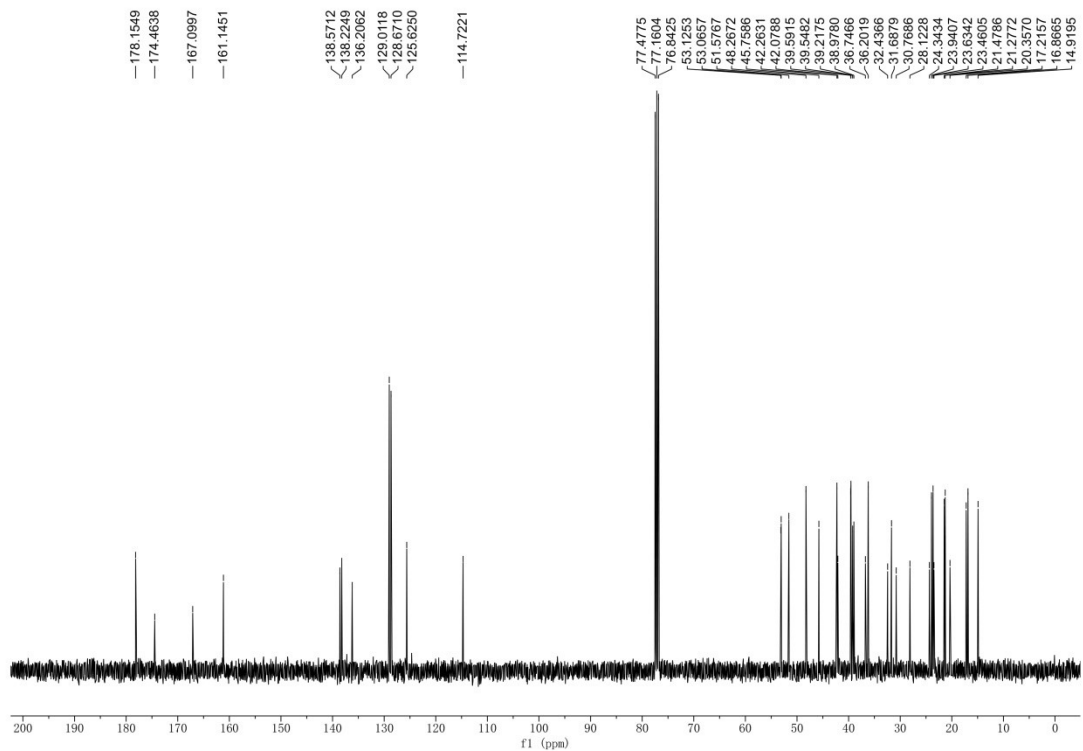

**Fig. S5.**  $^{13}\text{C}$  NMR spectrum of compound **6b** (150 MHz,  $\text{CDCl}_3$ )

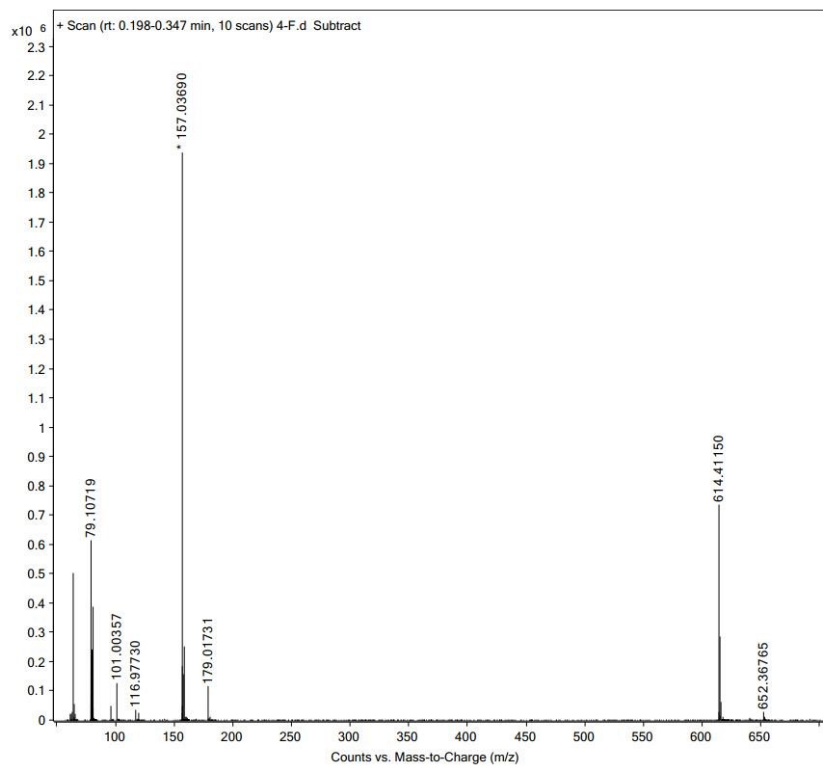

**Fig. S6.** HRMS spectrum of compound **6b**

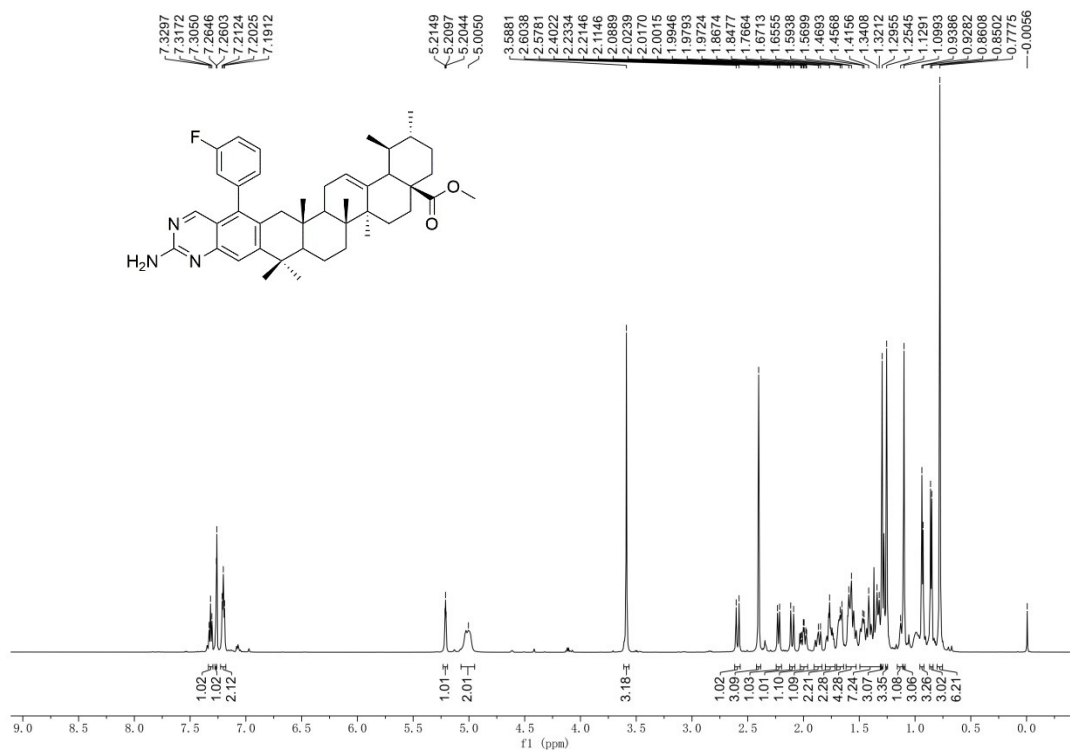

**Fig. S7.** <sup>1</sup>H NMR spectrum of compound 6c (600 MHz, CDCl<sub>3</sub>)

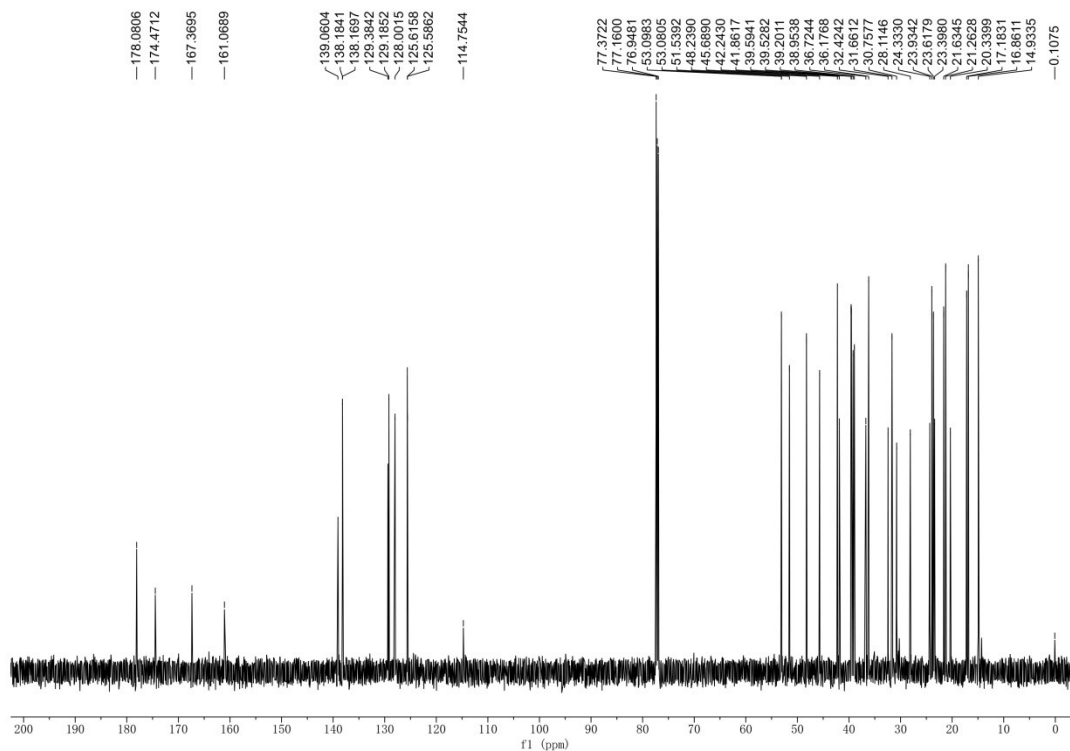

**Fig. S8.** <sup>13</sup>C NMR spectrum of compound 6c (150 MHz, CDCl<sub>3</sub>)

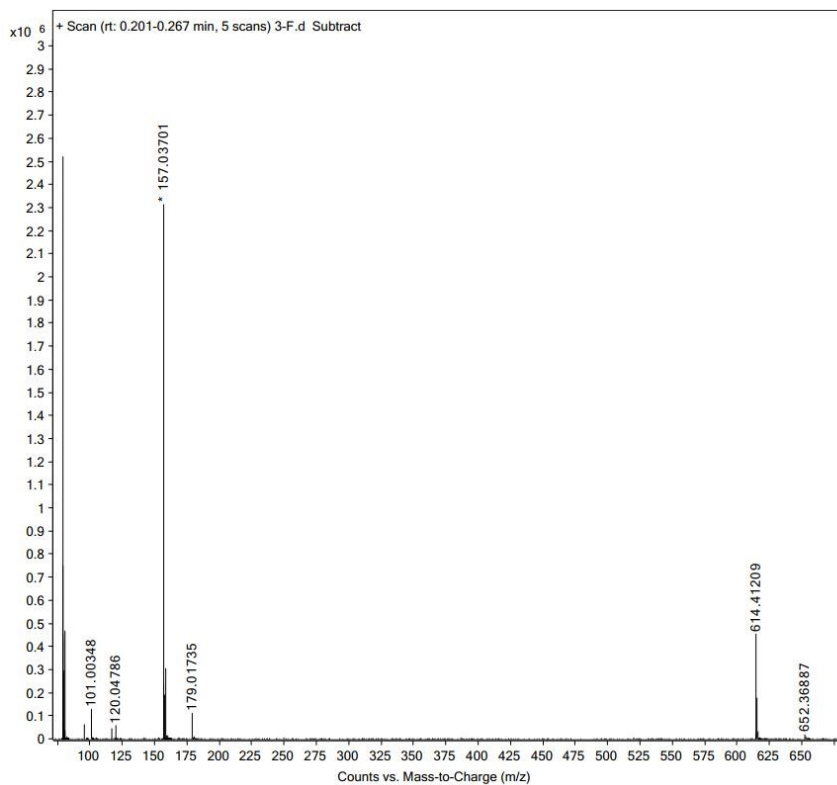

**Fig. S9. HRMS spectrum of compound 6c**

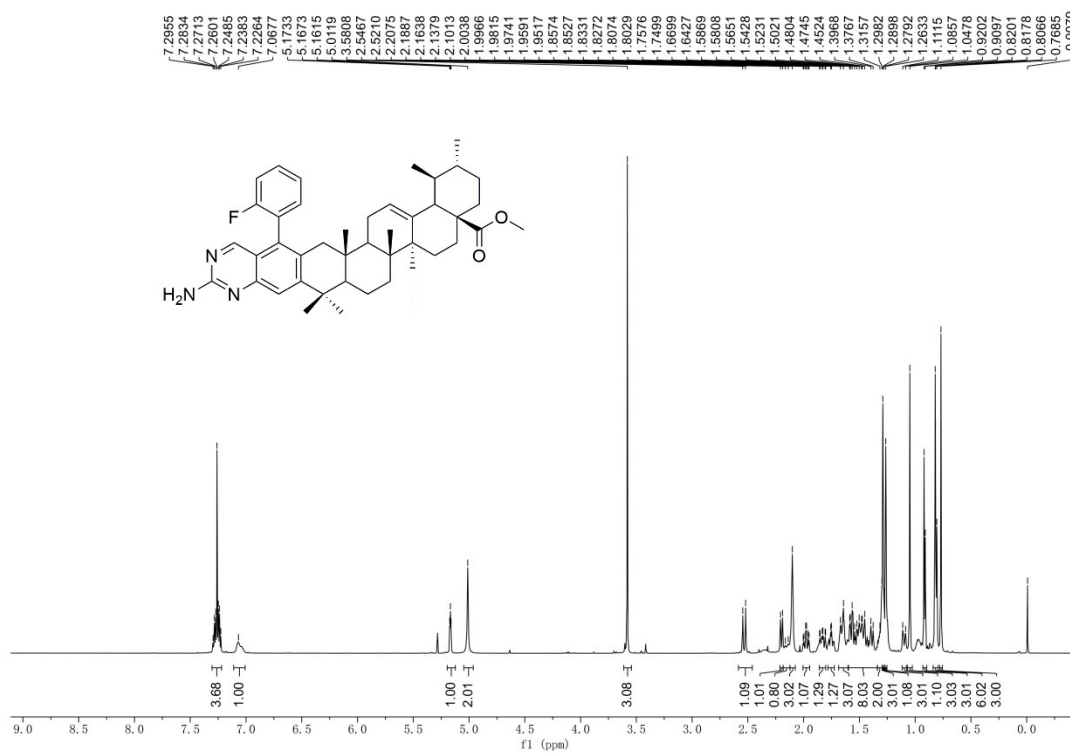

**Fig. S10. <sup>1</sup>H NMR spectrum of compound 6d (600 MHz, CDCl<sub>3</sub>)**

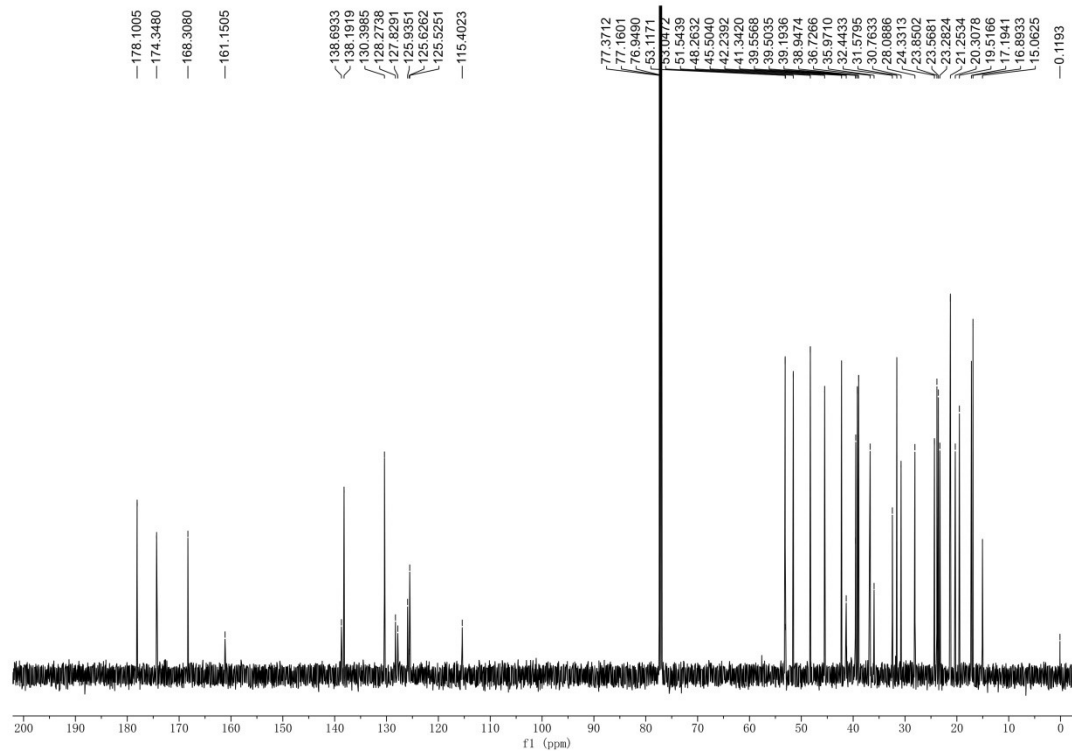

**Fig. S11.**  $^{13}\text{C}$  NMR spectrum of compound 6d (150 MHz,  $\text{CDCl}_3$ )

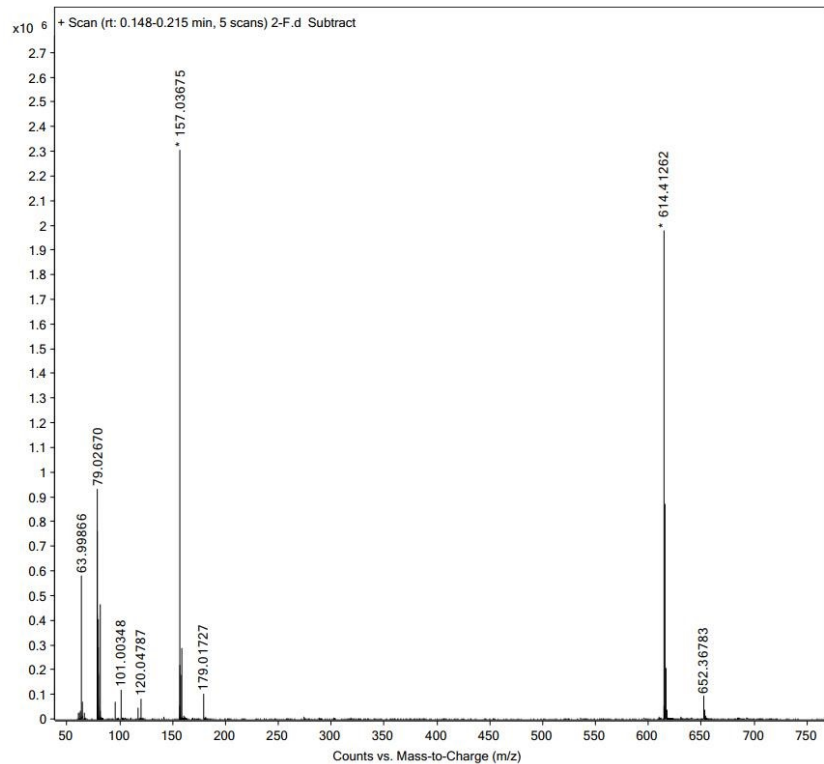

**Fig. S12.** HRMS spectrum of compound 6d

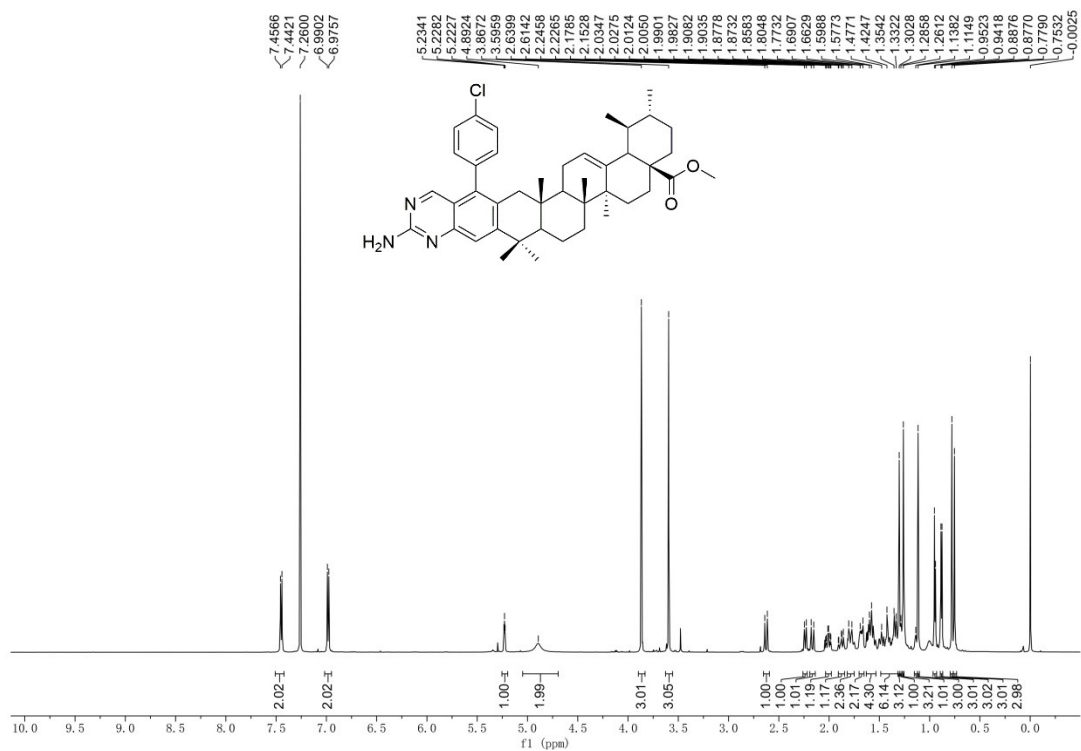

Fig. S13. <sup>1</sup>H NMR spectrum of compound 6e (600 MHz, CDCl<sub>3</sub>)

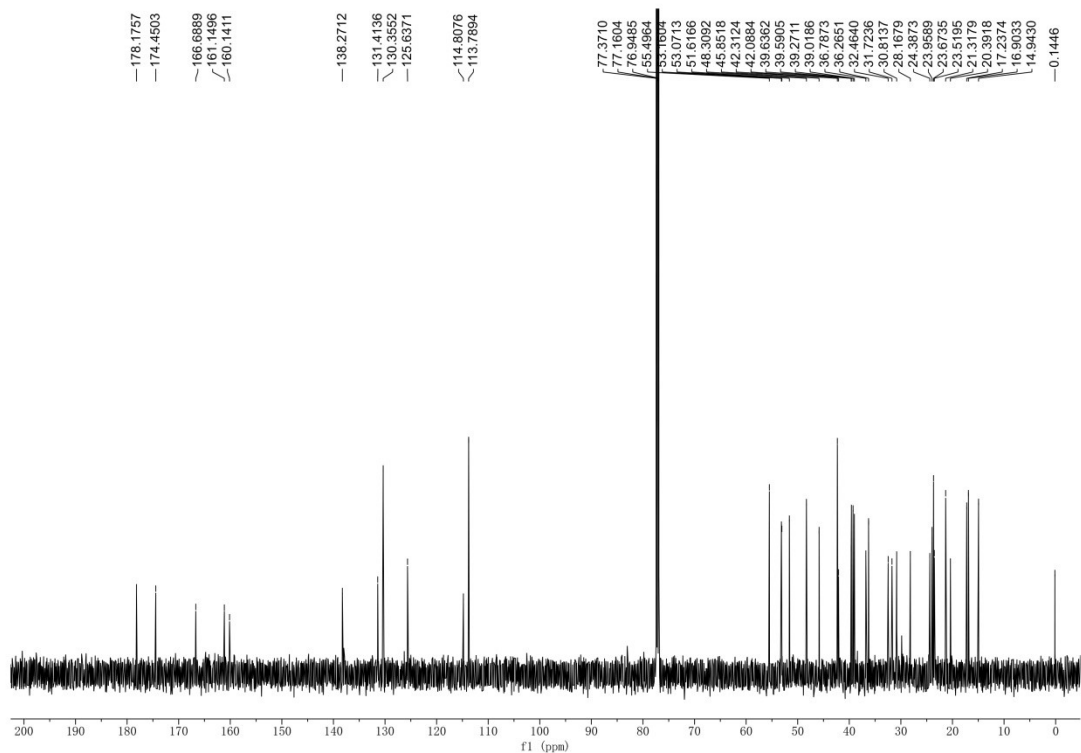

Fig. S14. <sup>13</sup>C NMR spectrum of compound 6e (150 MHz, CDCl<sub>3</sub>)



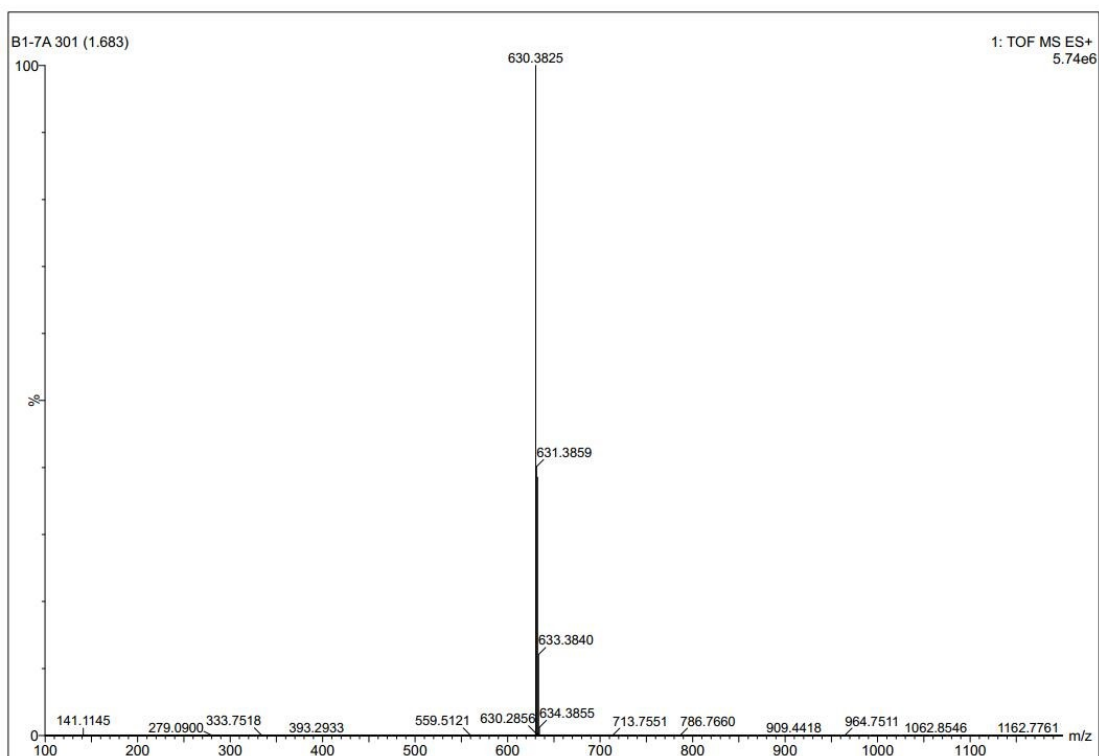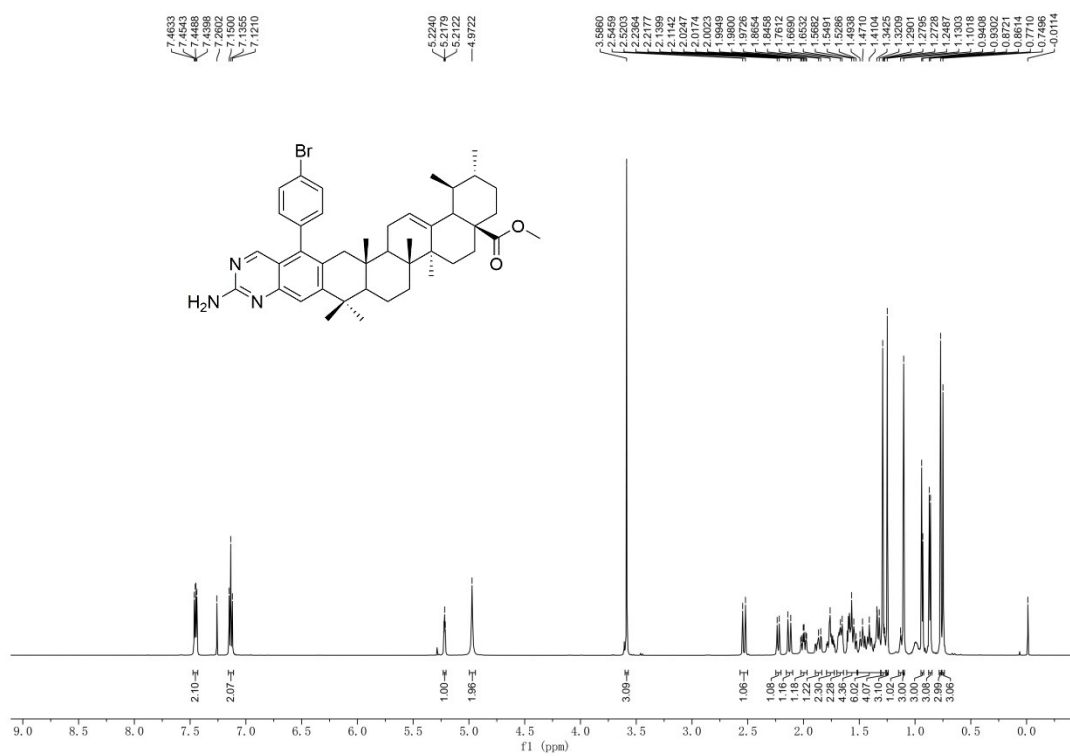

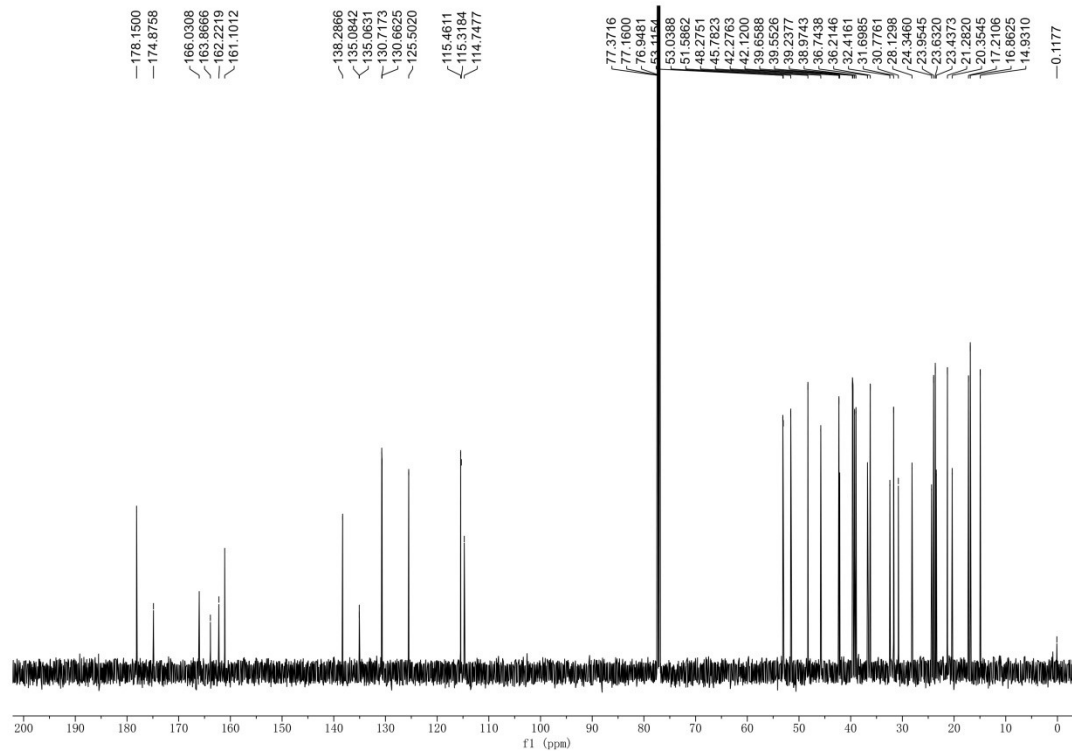

**Fig. S17.**  $^{13}\text{C}$  NMR spectrum of compound **6f** (150 MHz,  $\text{CDCl}_3$ )

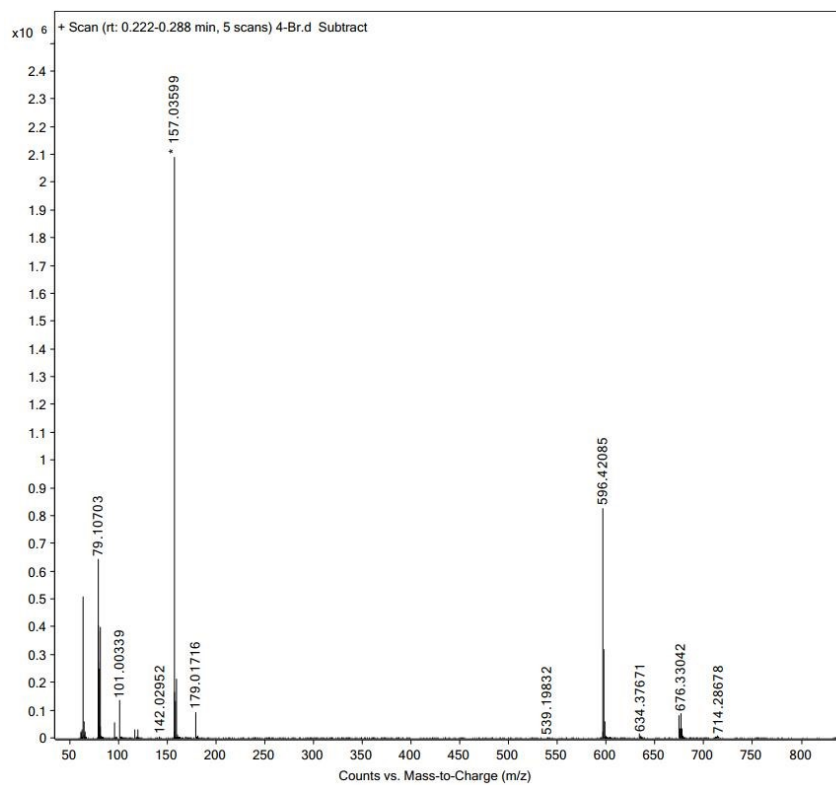

**Fig. S18.** HRMS spectrum of compound **6f**

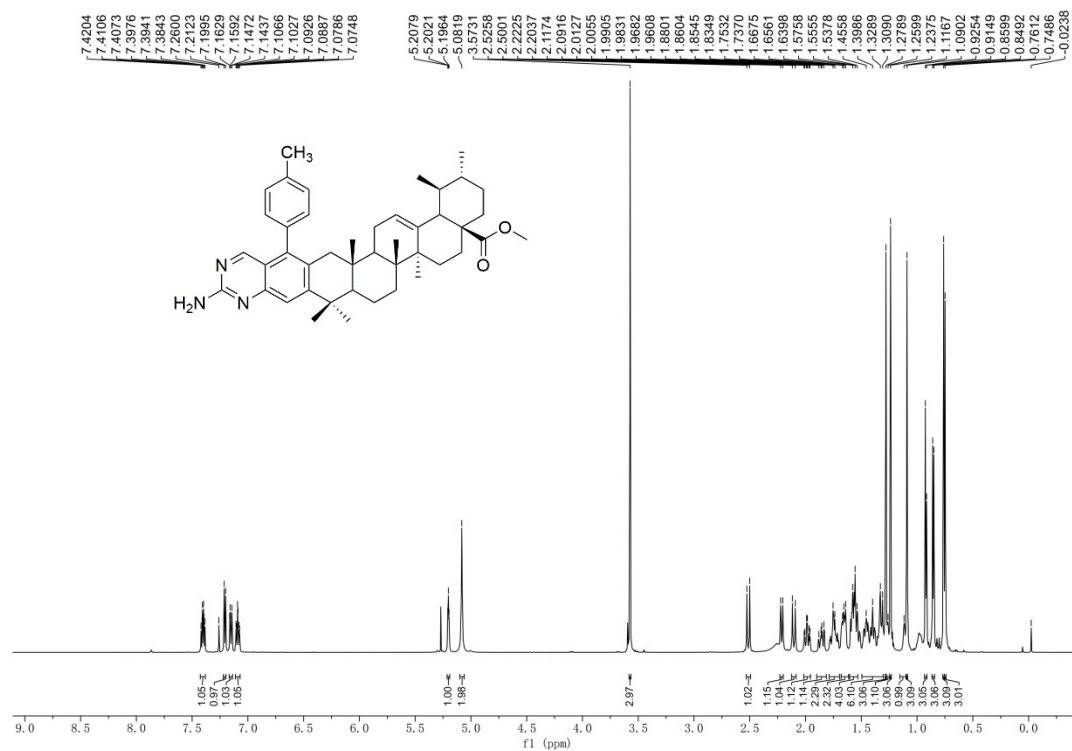

**Fig. S19.**  $^1\text{H}$  NMR spectrum of compound 6g (600 MHz,  $\text{CDCl}_3$ )

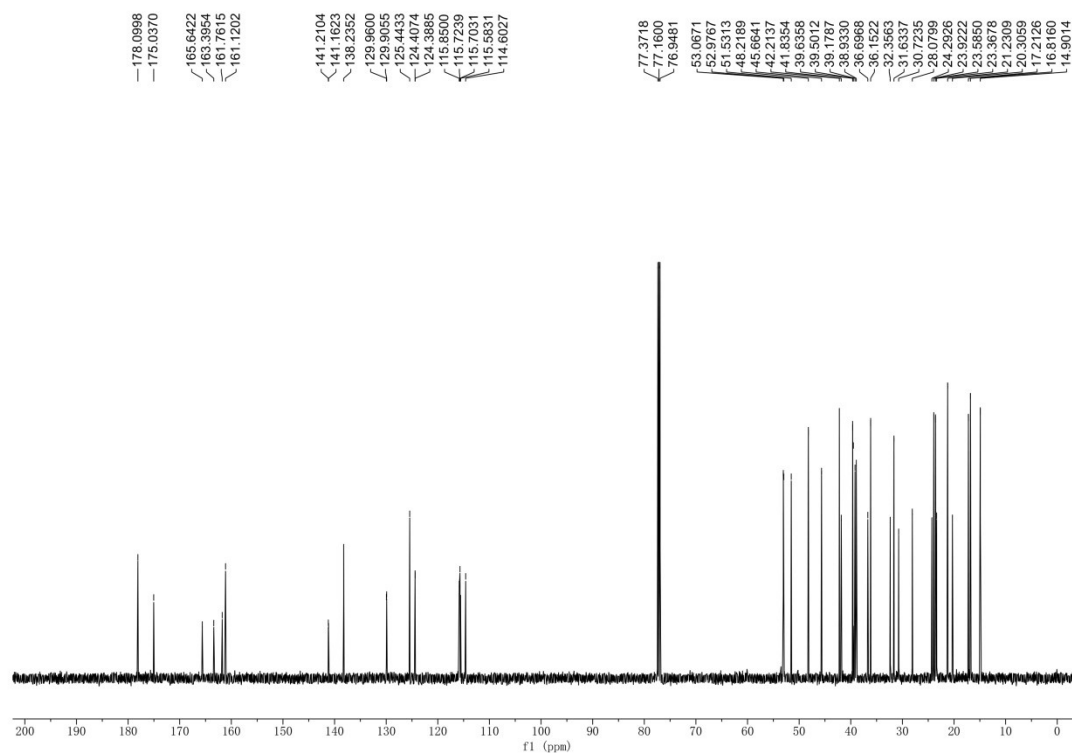

**Fig. S20.**  $^{13}\text{C}$  NMR spectrum of compound 6g (150 MHz,  $\text{CDCl}_3$ )

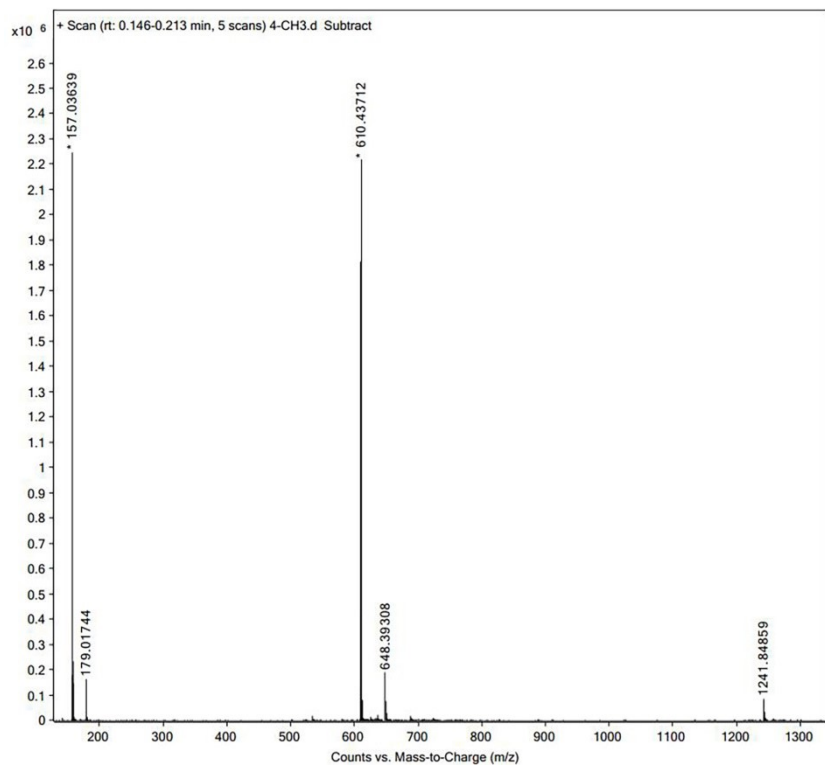

**Fig. S21.** HRMS spectrum of compound 6g

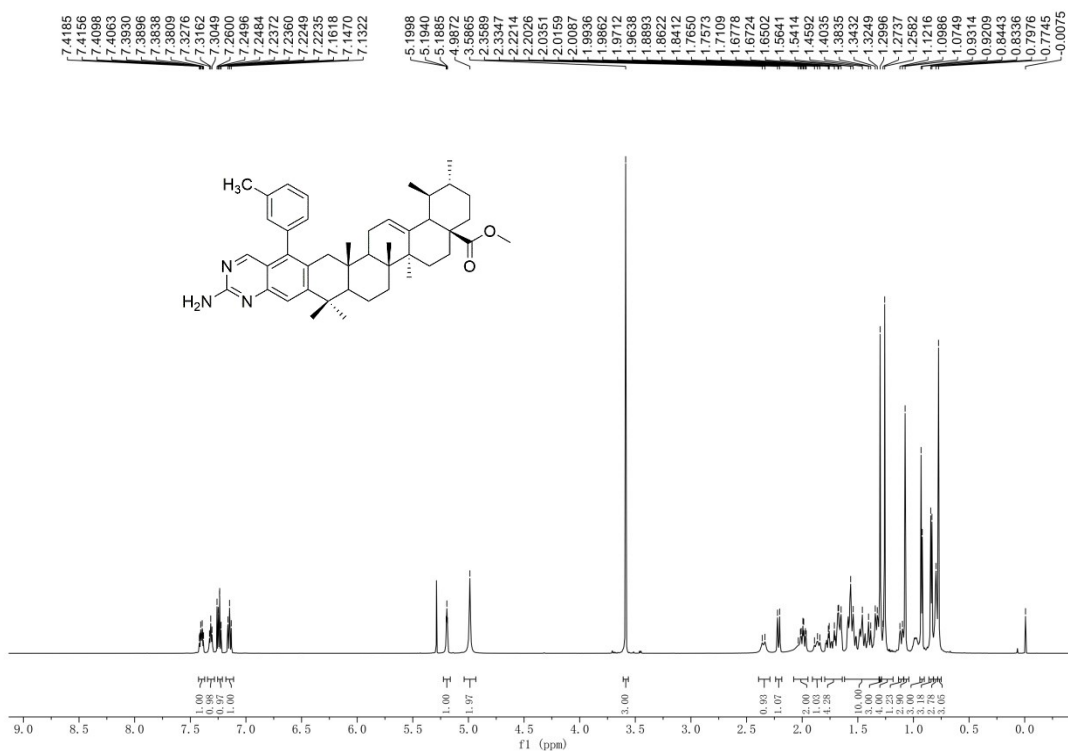

**Fig. S22.** <sup>1</sup>H NMR spectrum of compound 6h (600 MHz, CDCl<sub>3</sub>)

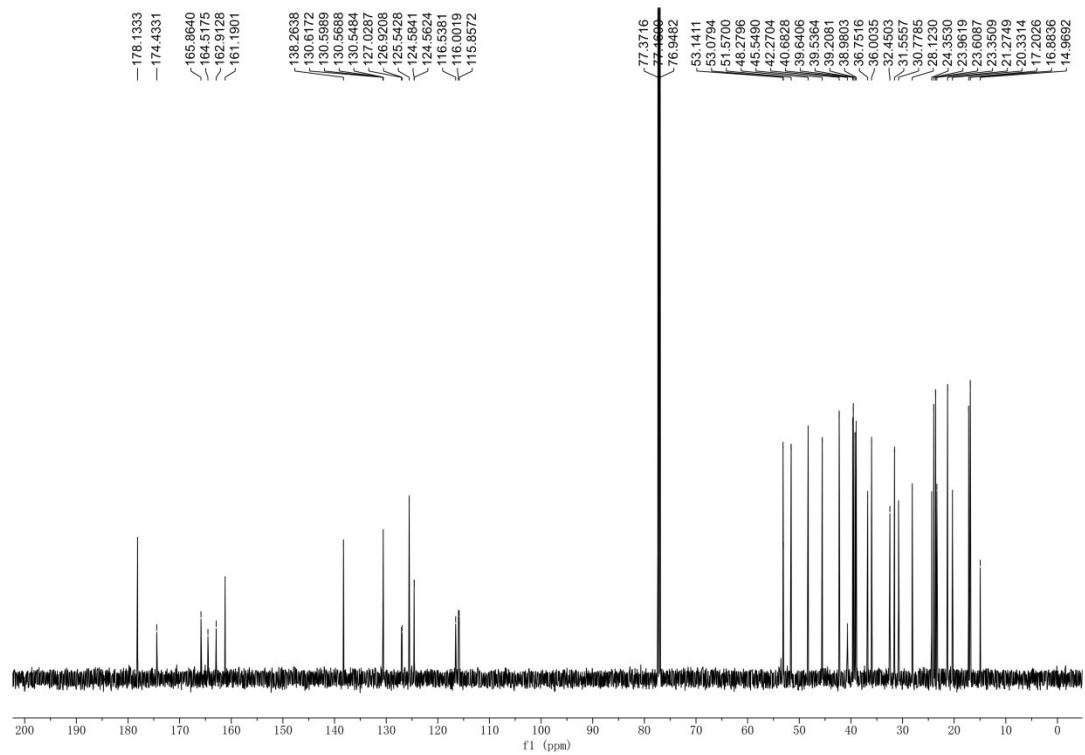

**Fig. S23.** <sup>13</sup>C NMR spectrum of compound 6h (150 MHz, CDCl<sub>3</sub>)

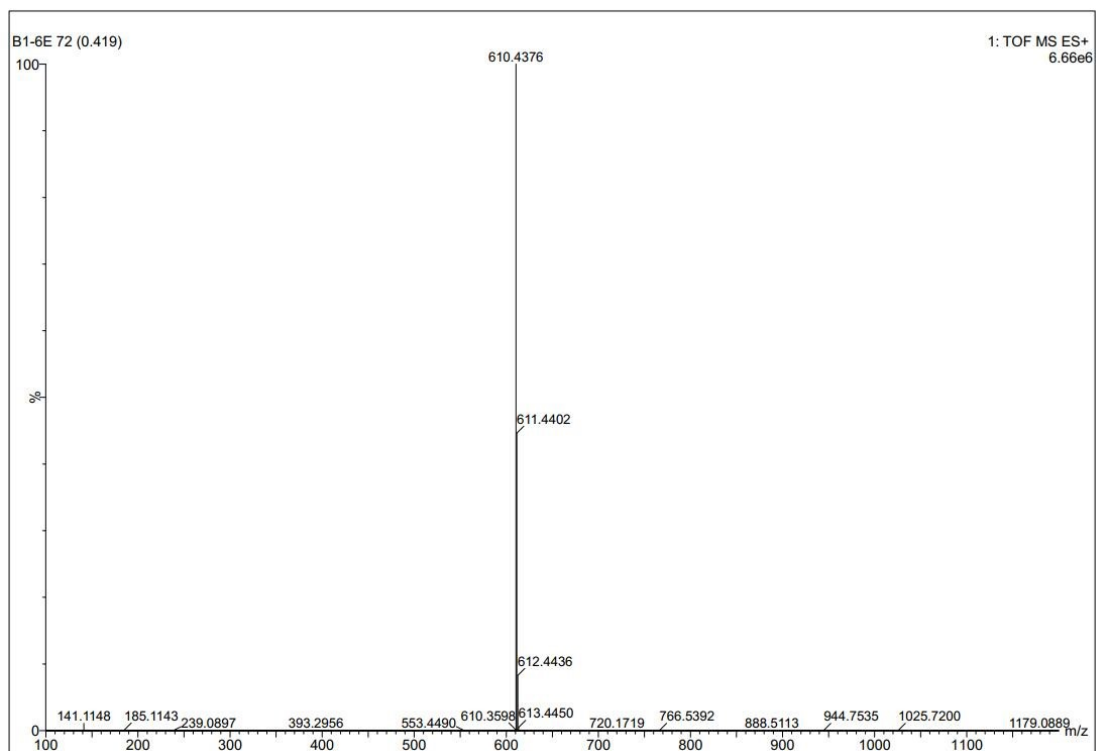

**Fig. S24.** HRMS spectrum of compound 6h



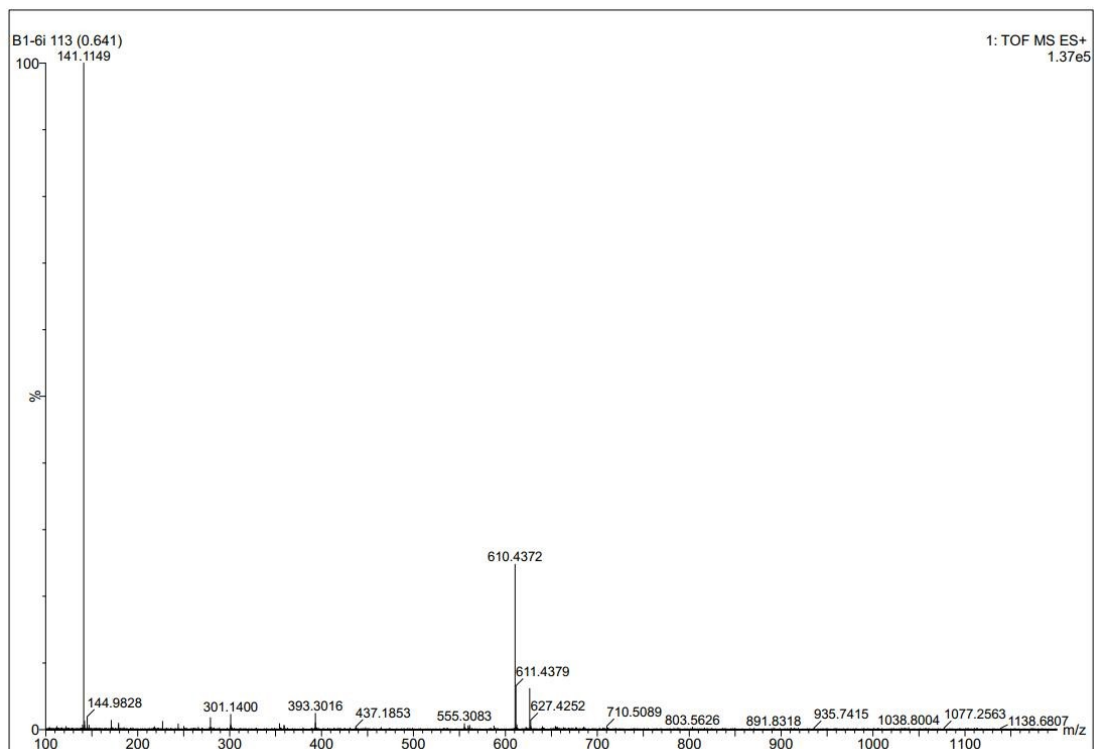

Fig. S27. HRMS spectrum of compound 6i

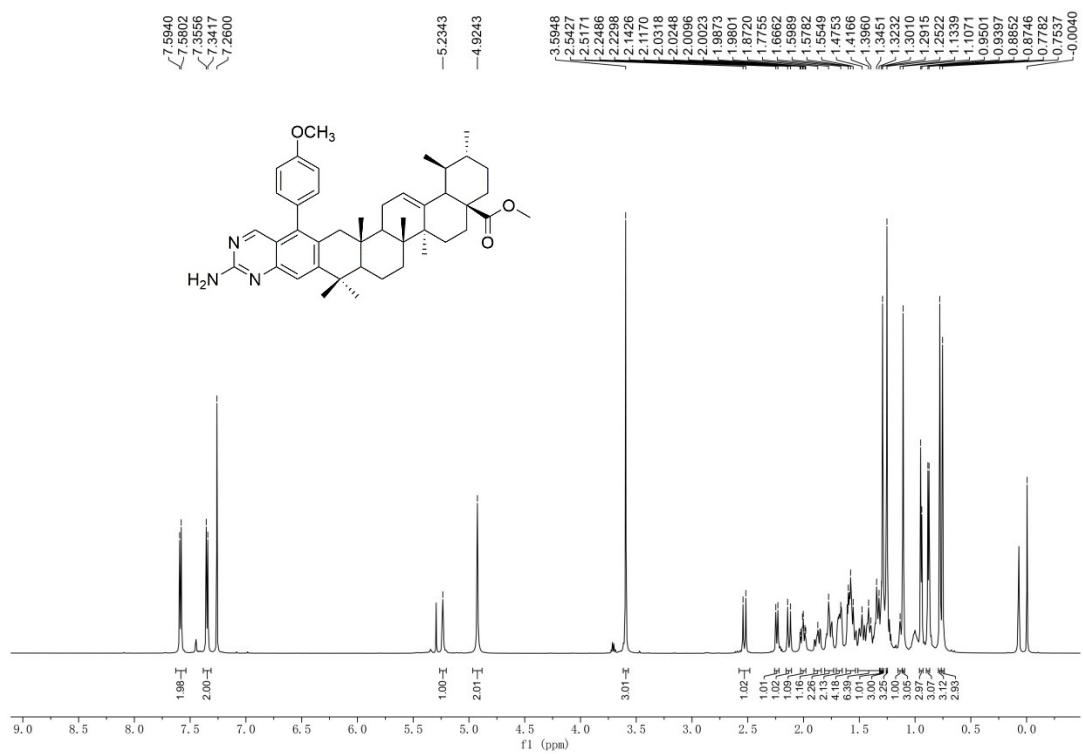

Fig. S28. <sup>1</sup>H NMR spectrum of compound 6j (600 MHz, CDCl<sub>3</sub>)

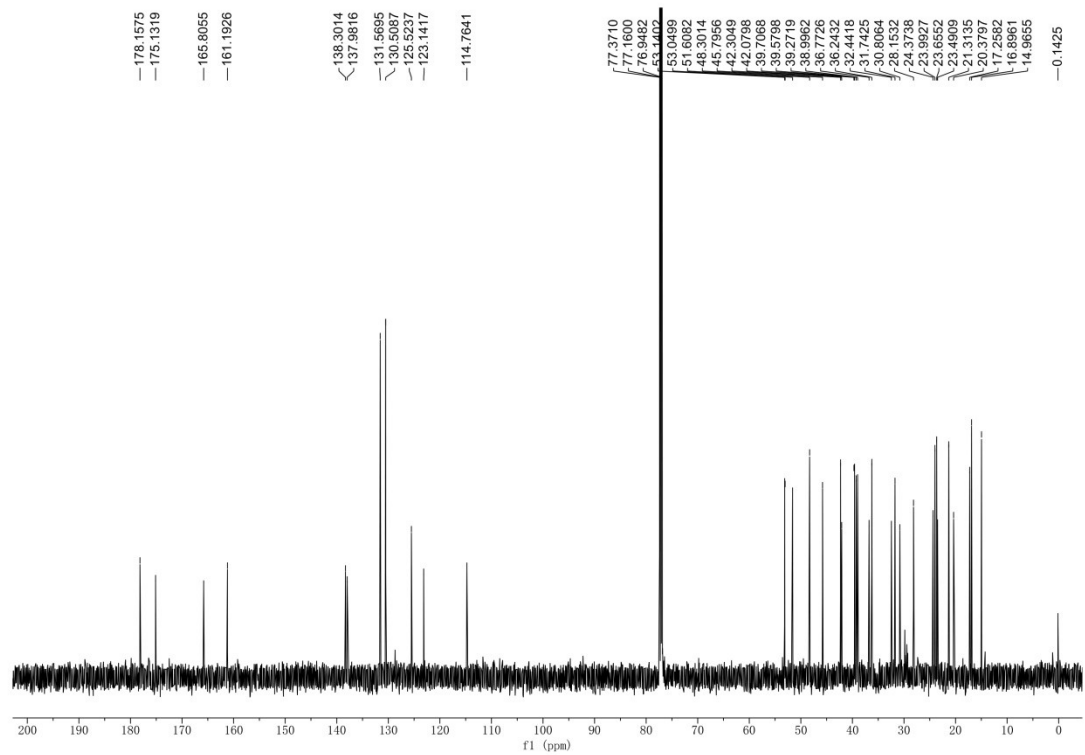

**Fig. S29.**  $^{13}\text{C}$  NMR spectrum of compound **6j** (150 MHz,  $\text{CDCl}_3$ )

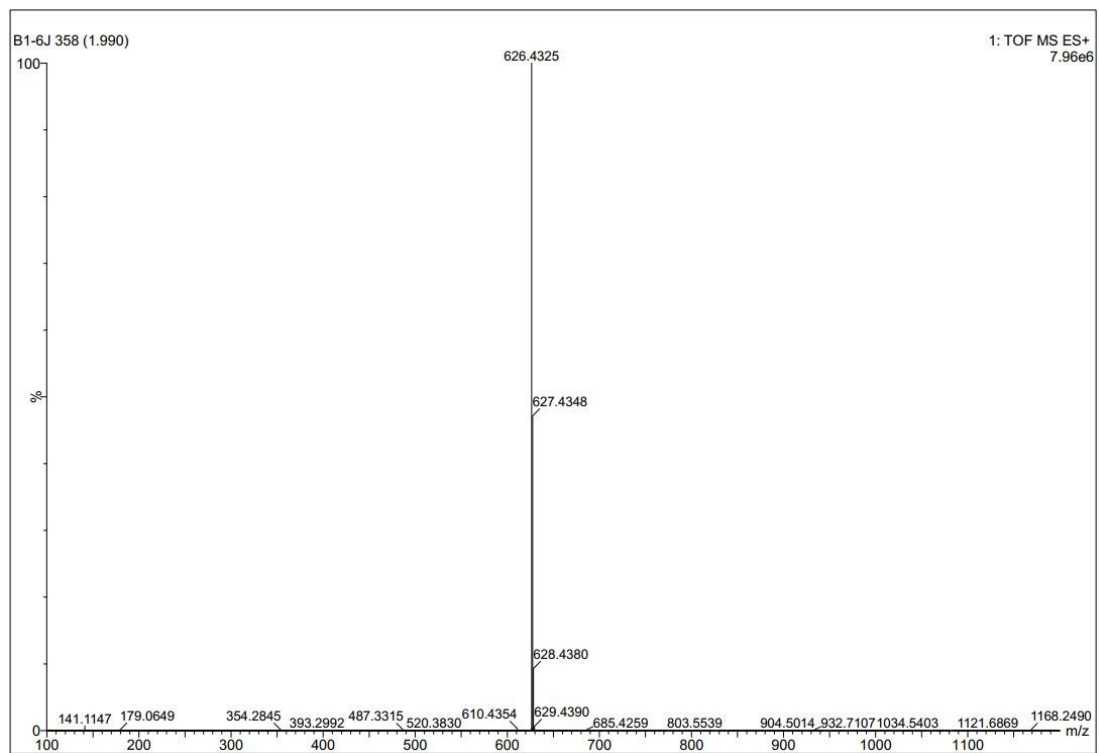

**Fig. S30.** HRMS spectrum of compound **6j**



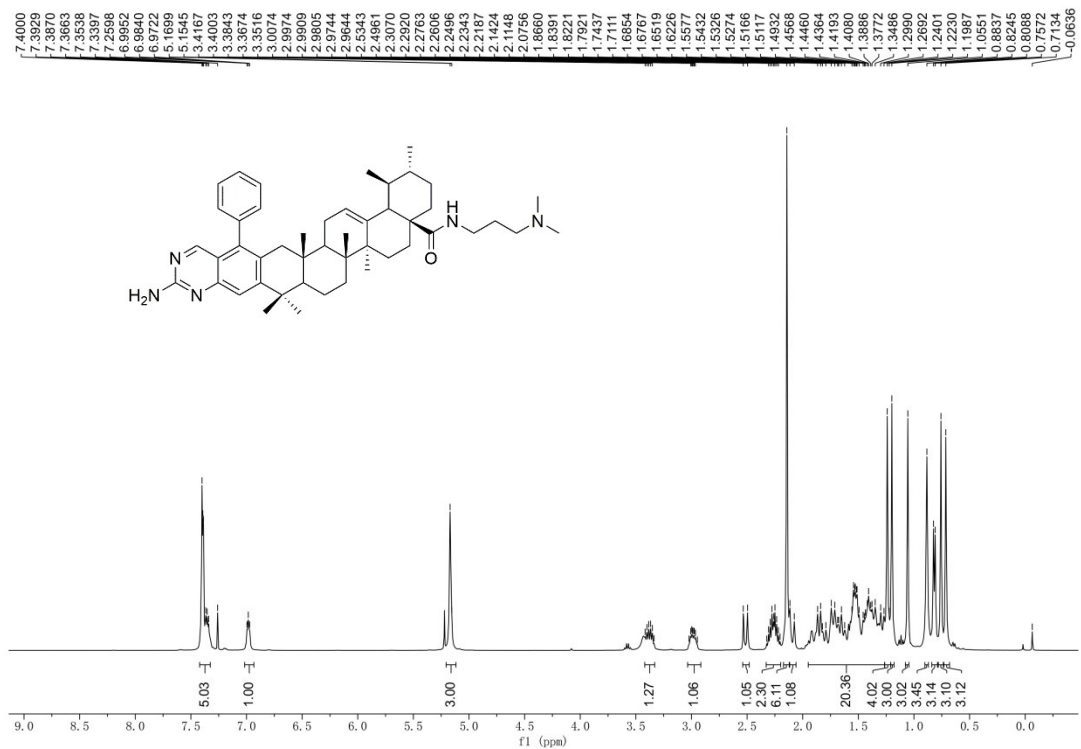

**Fig. S31.** <sup>1</sup>H NMR spectrum of compound 7a (600 MHz, CDCl<sub>3</sub>)

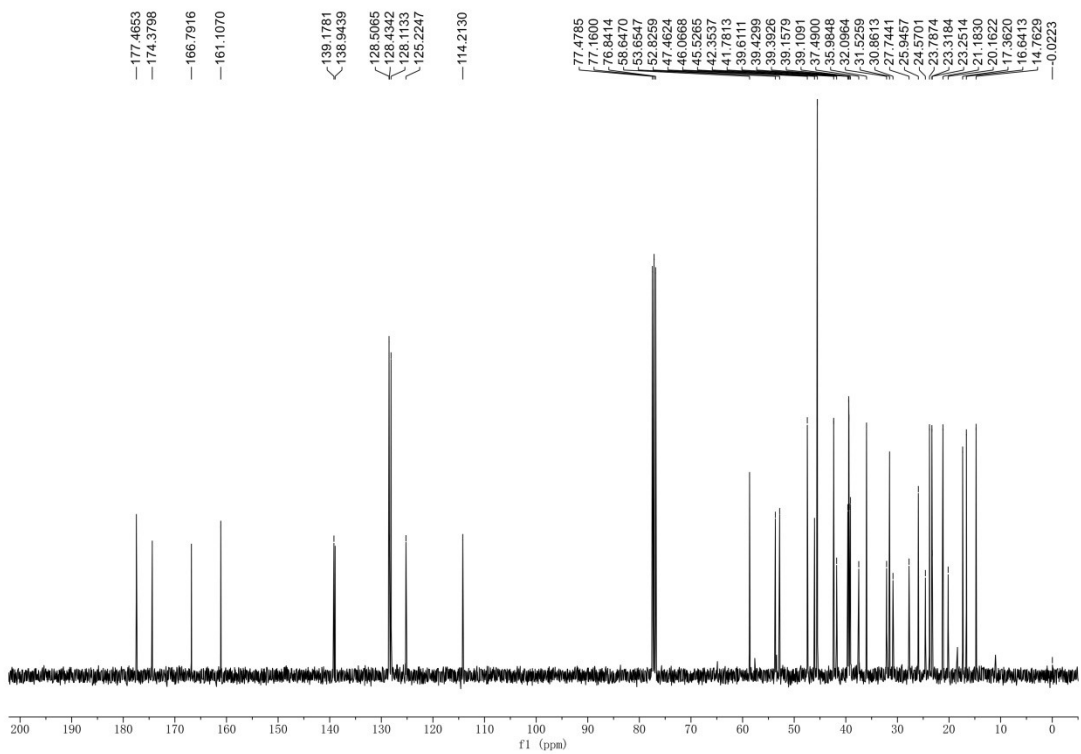

**Fig. S32.** <sup>13</sup>C NMR spectrum of compound 7a (150 MHz, CDCl<sub>3</sub>)

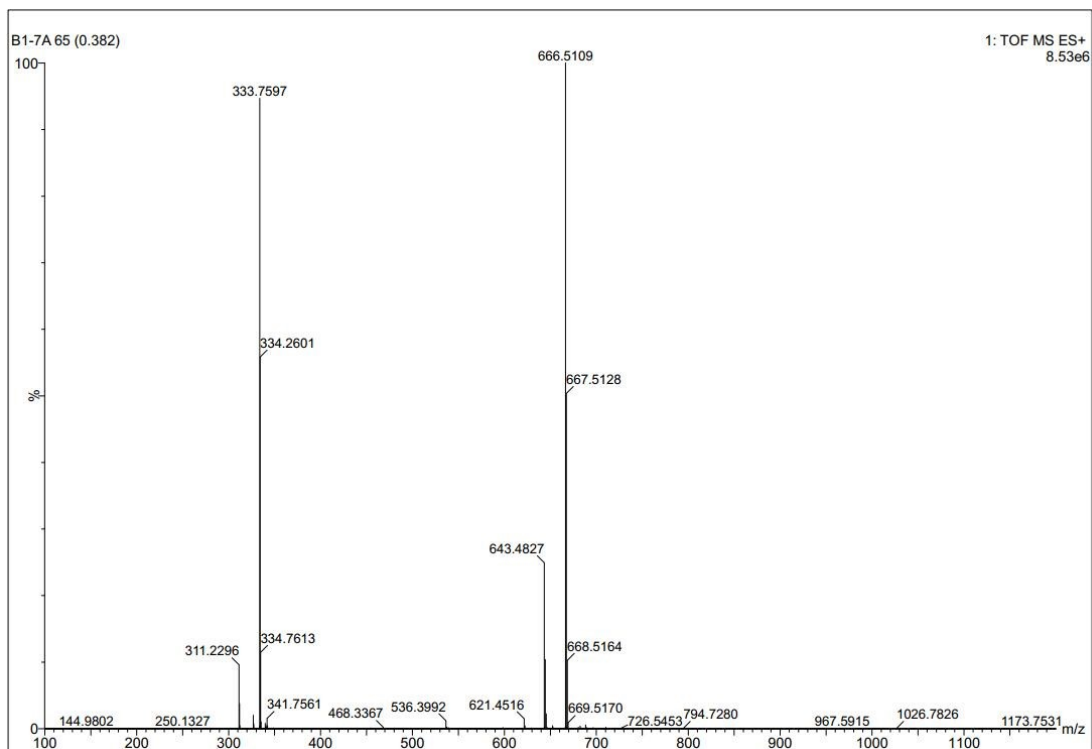

**Fig. S33.** HRMS spectrum of compound 7a

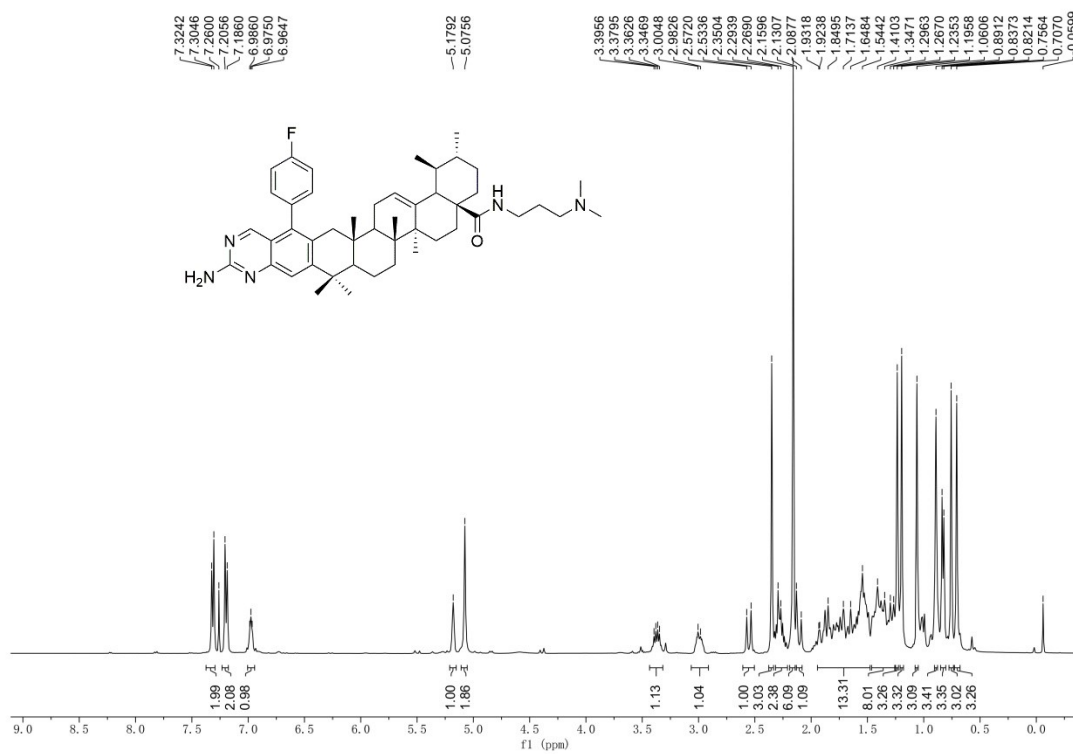

**Fig. S34.** <sup>1</sup>H NMR spectrum of compound 7b (600 MHz, CDCl<sub>3</sub>)

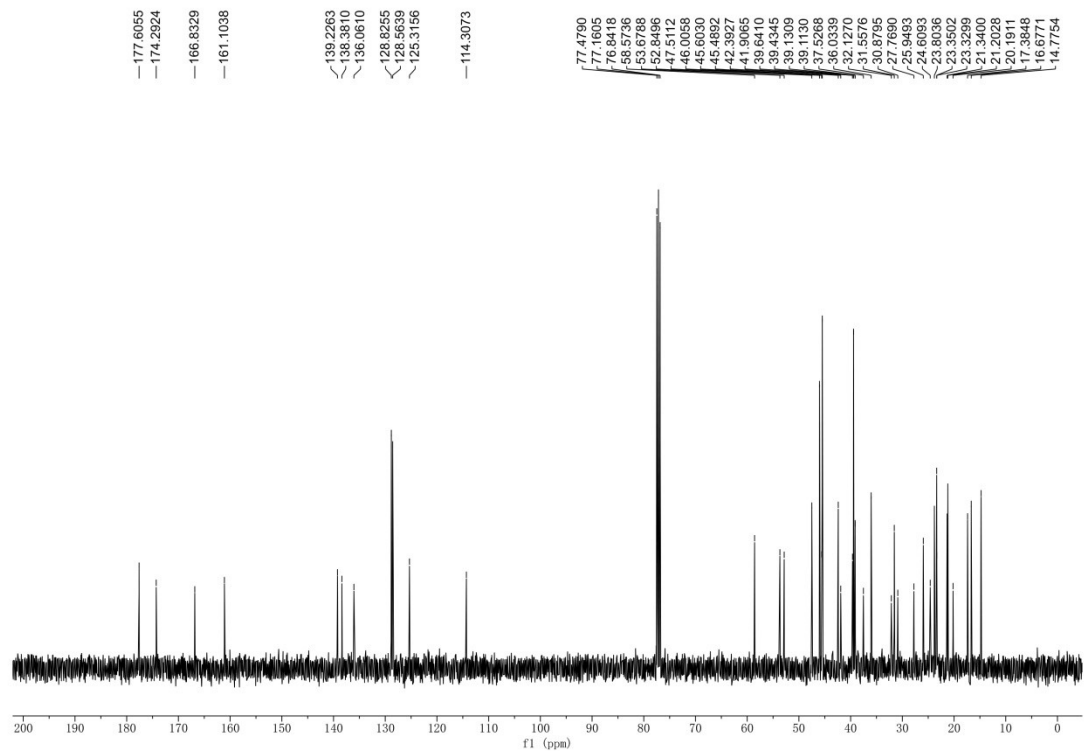

**Fig. S35.**  $^{13}\text{C}$  NMR spectrum of compound **7b** (150 MHz,  $\text{CDCl}_3$ )

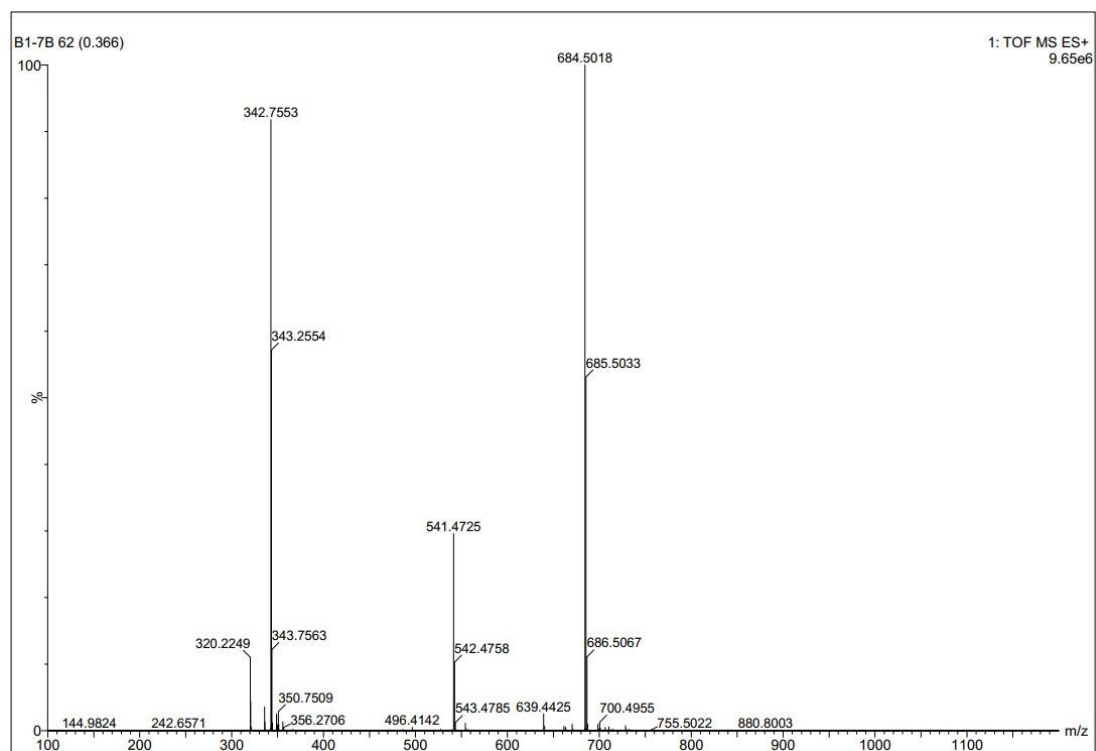

**Fig. S36.** HRMS spectrum of compound **7b**

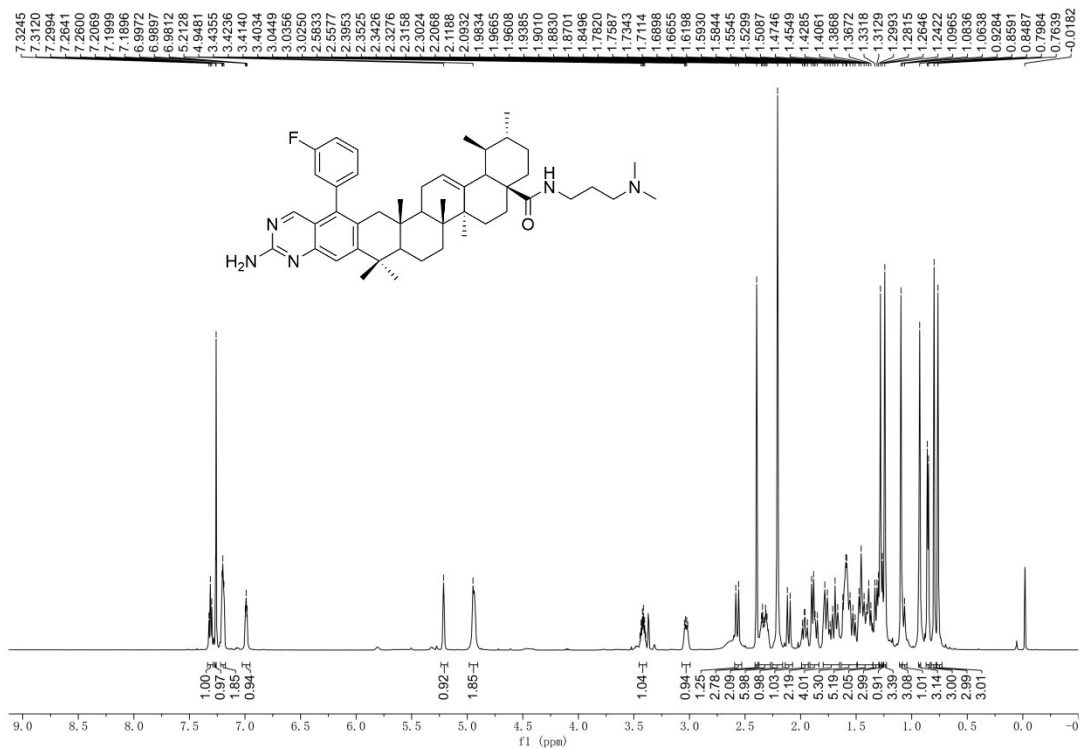

Fig. S37. <sup>1</sup>H NMR spectrum of compound 7c (600 MHz, CDCl<sub>3</sub>)

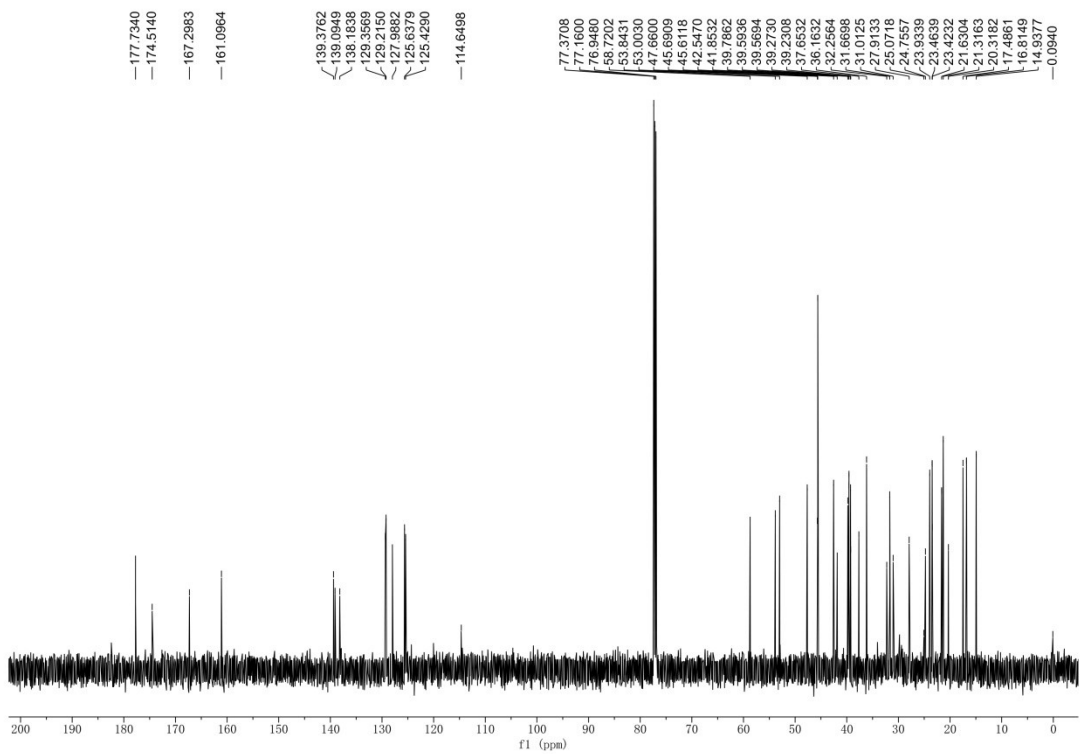

Fig. S38. <sup>13</sup>C NMR spectrum of compound 7c (150 MHz, CDCl<sub>3</sub>)

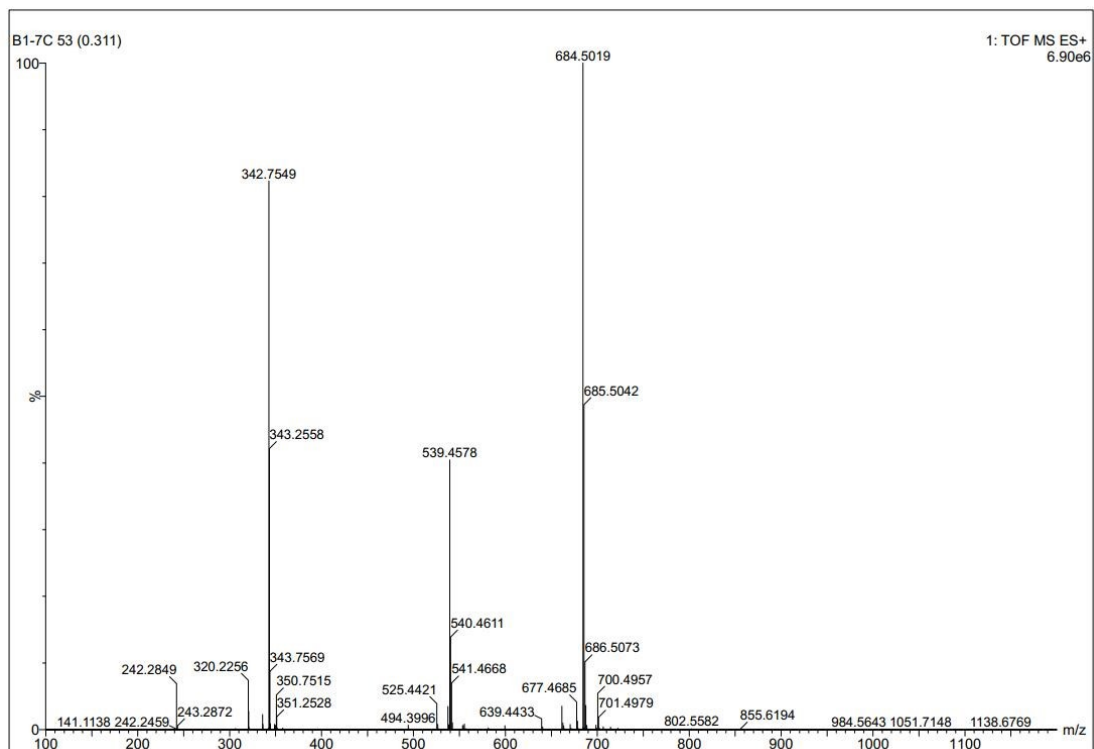

**Fig. S39.** HRMS spectrum of compound **7c**

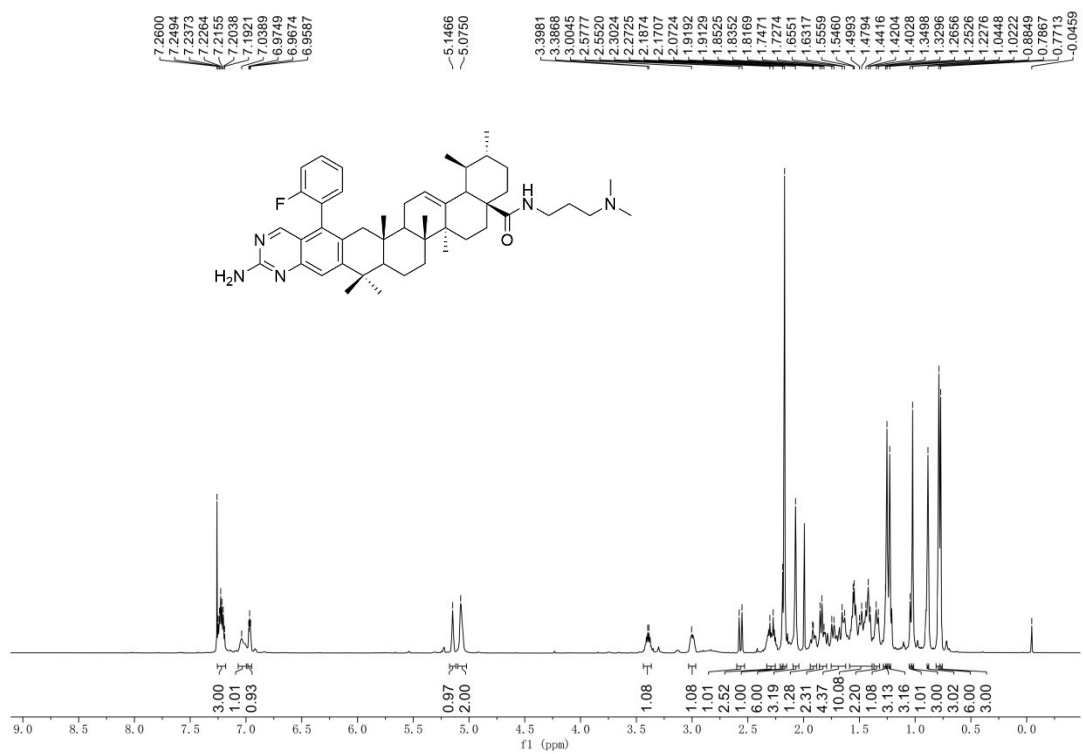

**Fig. S40.**  $^1\text{H}$  NMR spectrum of compound **7d** (600 MHz,  $\text{CDCl}_3$ )

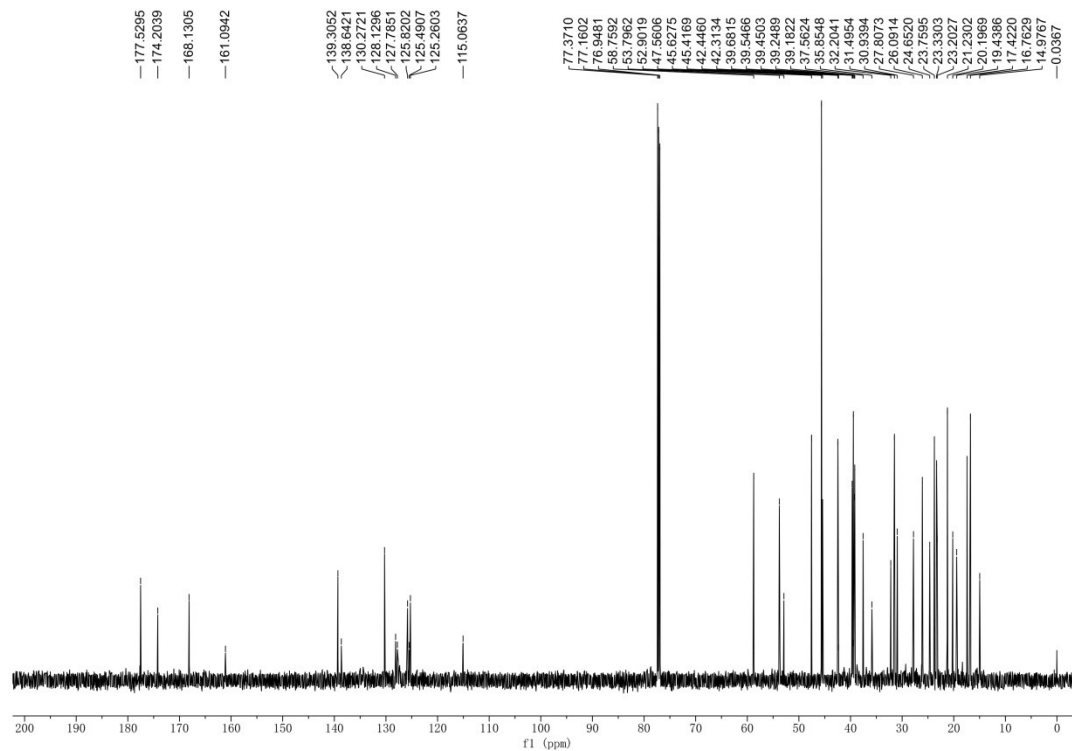

**Fig. S41.**  $^{13}\text{C}$  NMR spectrum of compound 7d (150 MHz,  $\text{CDCl}_3$ )

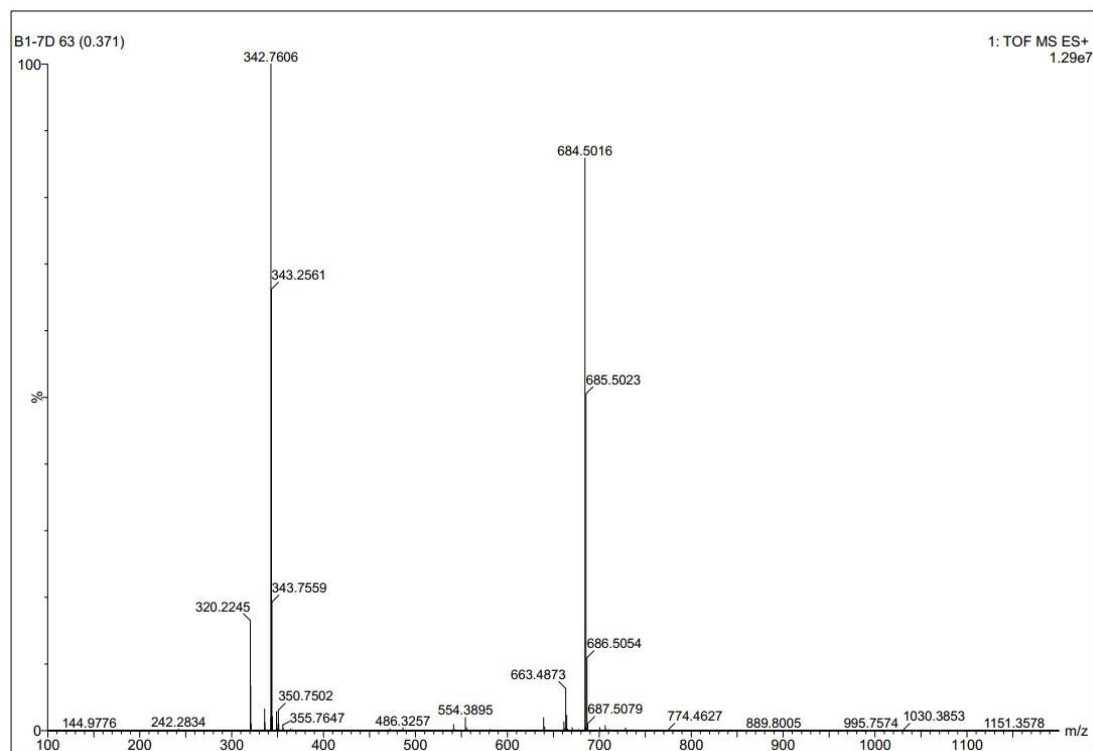

**Fig. S42.** HRMS spectrum of compound 7d

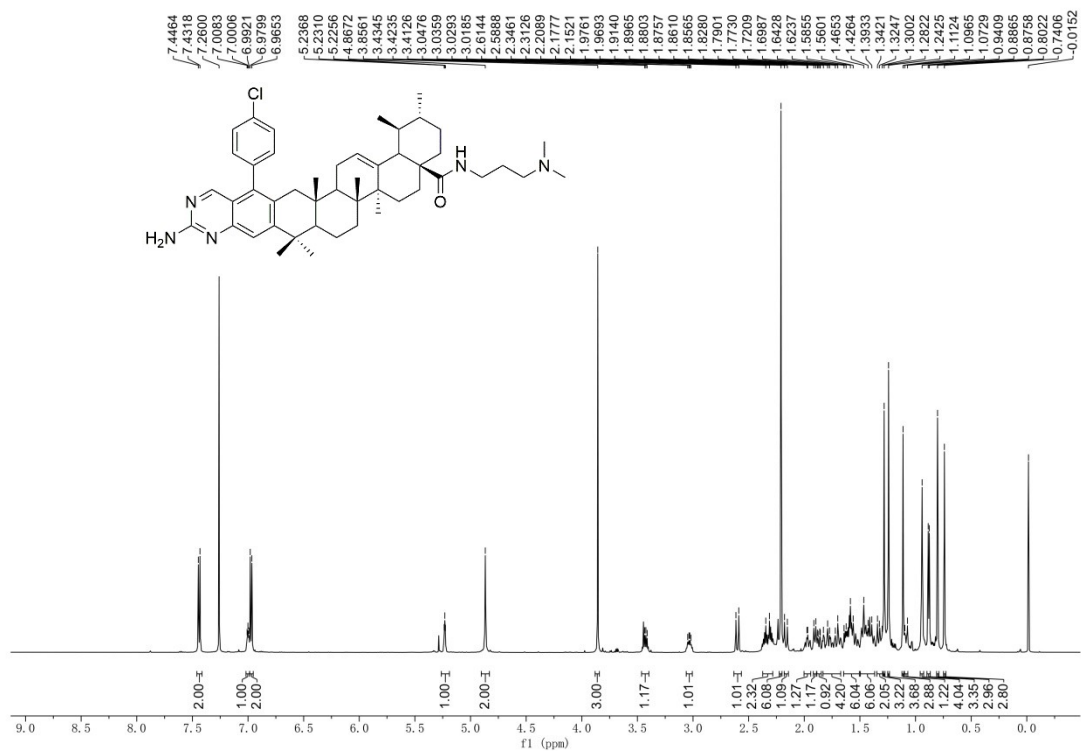

Fig. S43. <sup>1</sup>H NMR spectrum of compound 7e (600 MHz, CDCl<sub>3</sub>)

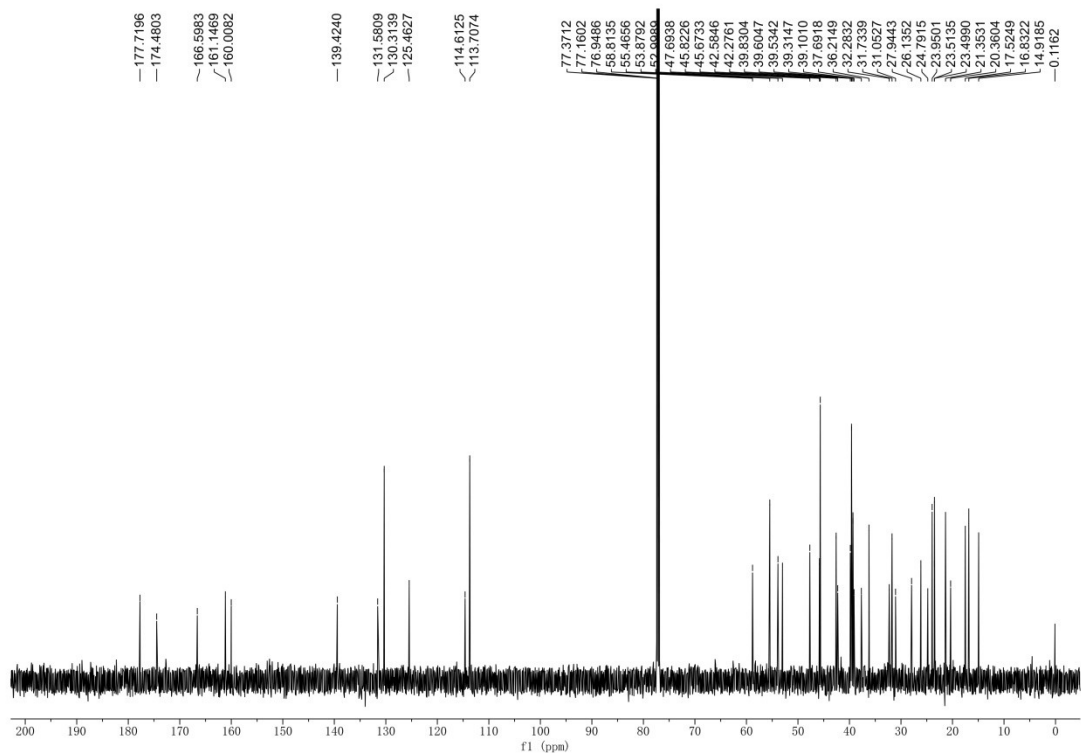

Fig. S44. <sup>13</sup>C NMR spectrum of compound 7e (150 MHz, CDCl<sub>3</sub>)

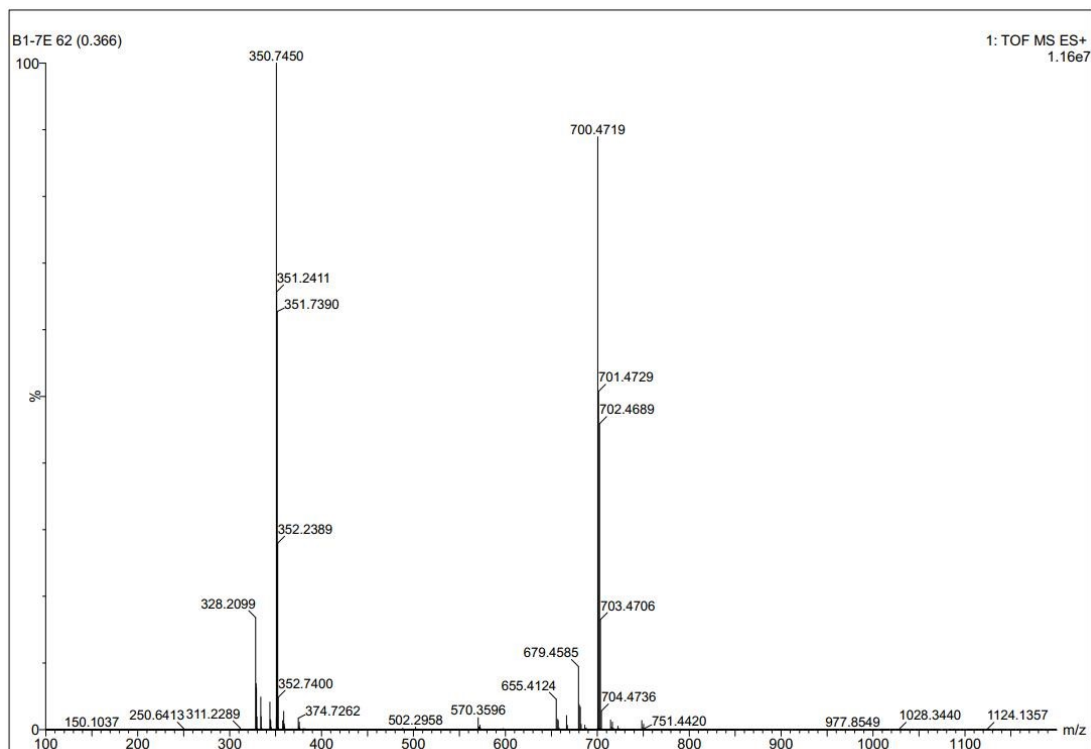

**Fig. S45. HRMS spectrum of compound 7e**

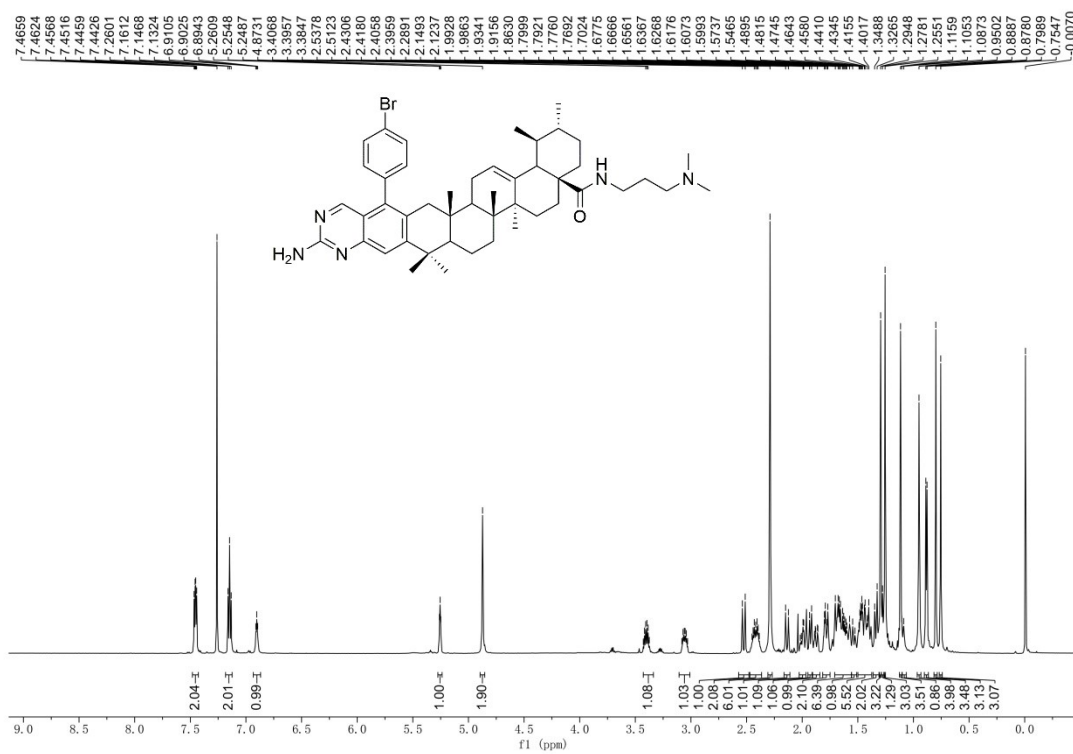

**Fig. S46. <sup>1</sup>H NMR spectrum of compound 7f (600 MHz, CDCl<sub>3</sub>)**



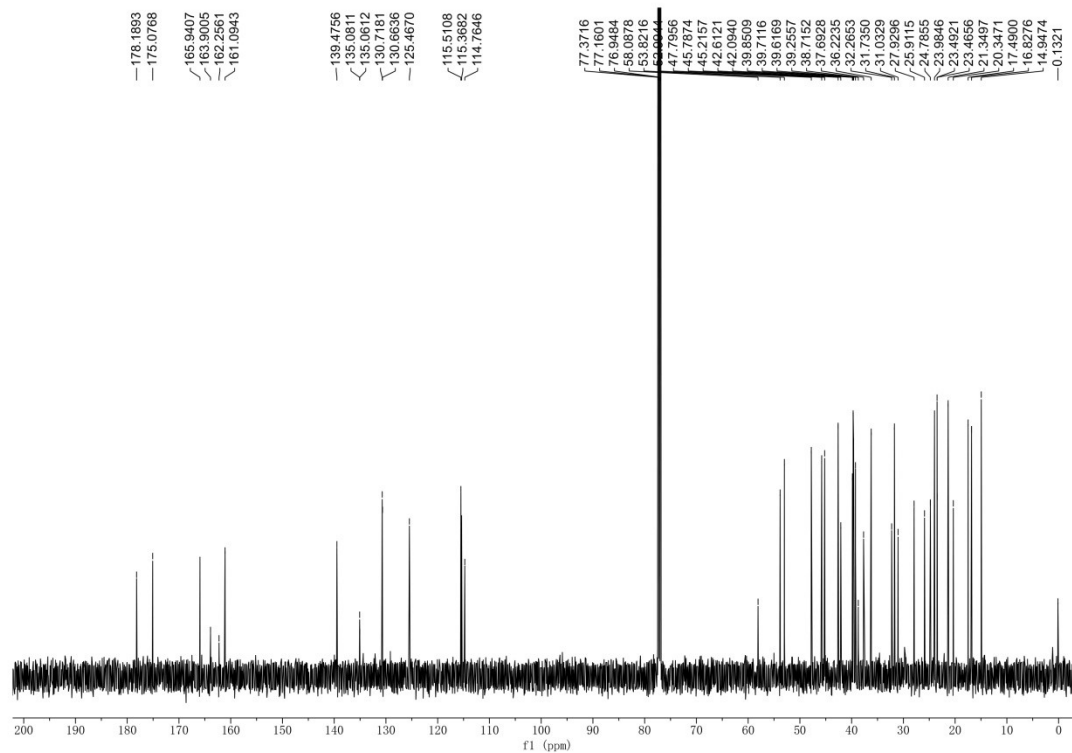

**Fig. S47.**  $^{13}\text{C}$  NMR spectrum of compound **7f** (150 MHz,  $\text{CDCl}_3$ )

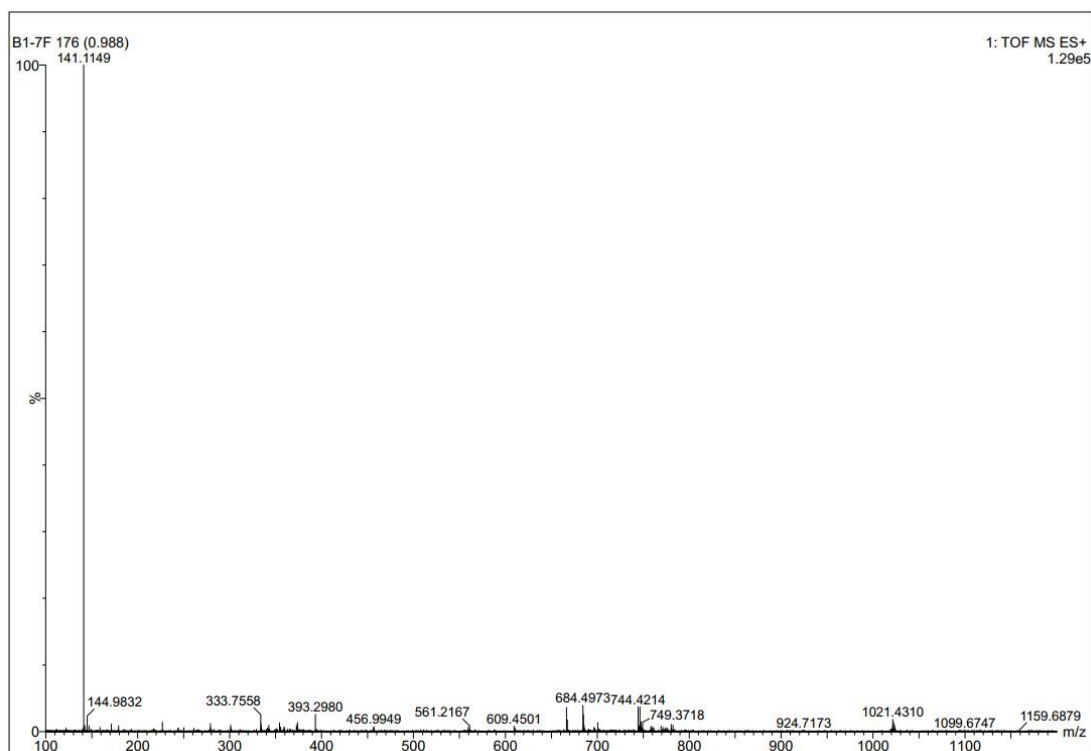

**Fig. S48.** HRMS spectrum of compound **7f**

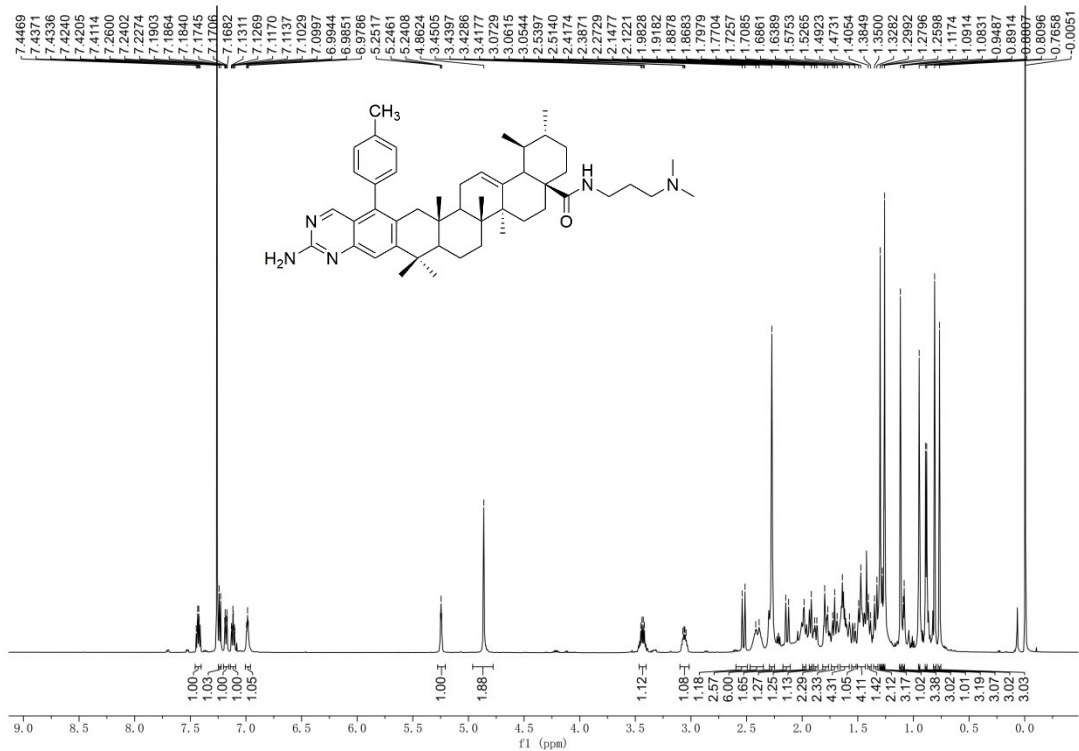

**Fig. S49.**  $^1\text{H}$  NMR spectrum of compound 7g (600 MHz,  $\text{CDCl}_3$ )

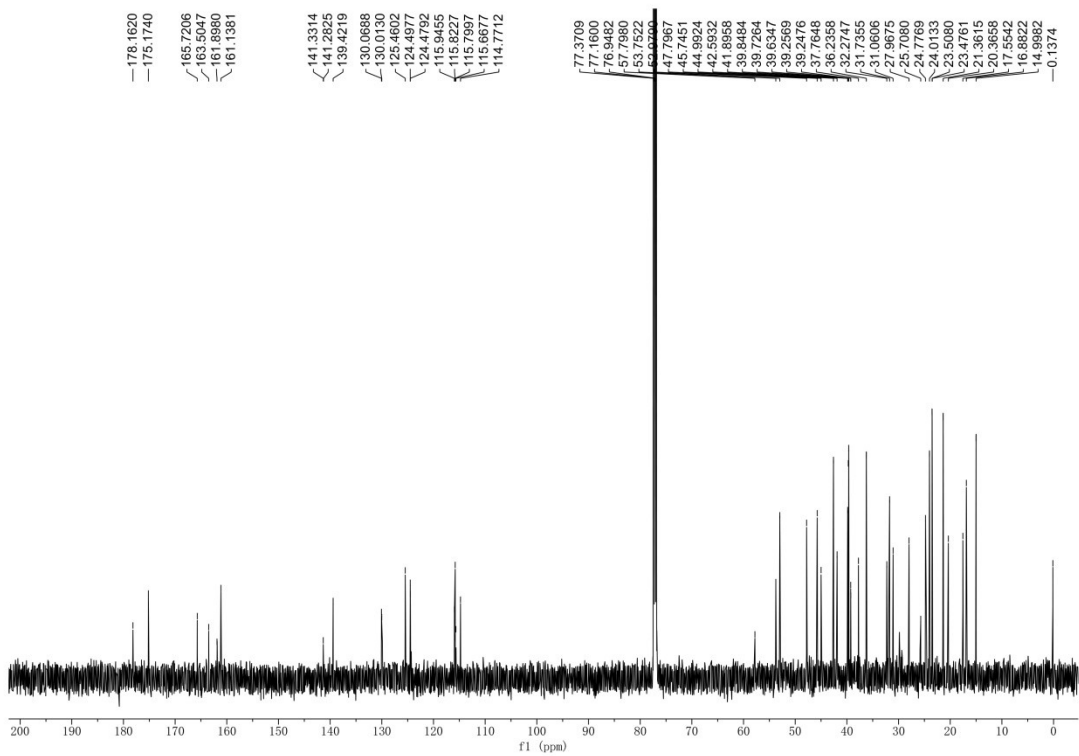

**Fig. S50.**  $^{13}\text{C}$  NMR spectrum of compound 7g (150 MHz,  $\text{CDCl}_3$ )

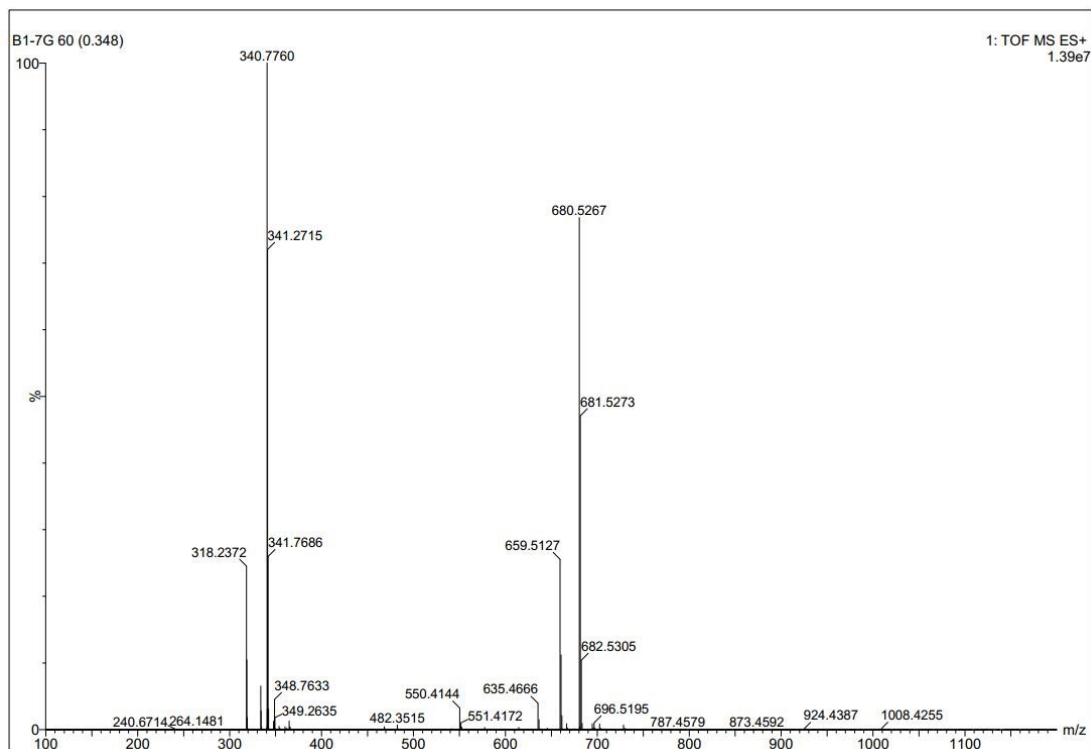

**Fig. S51.** HRMS spectrum of compound 7g

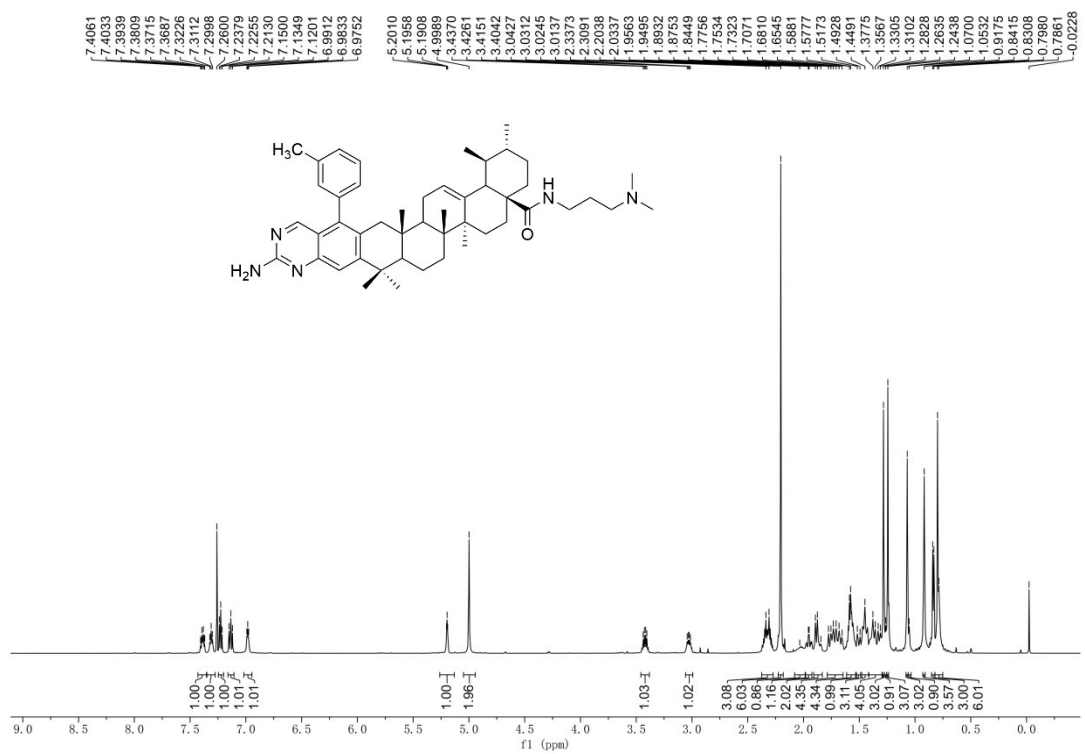

**Fig. S52.**  $^1\text{H}$  NMR spectrum of compound 7h (600 MHz,  $\text{CDCl}_3$ )

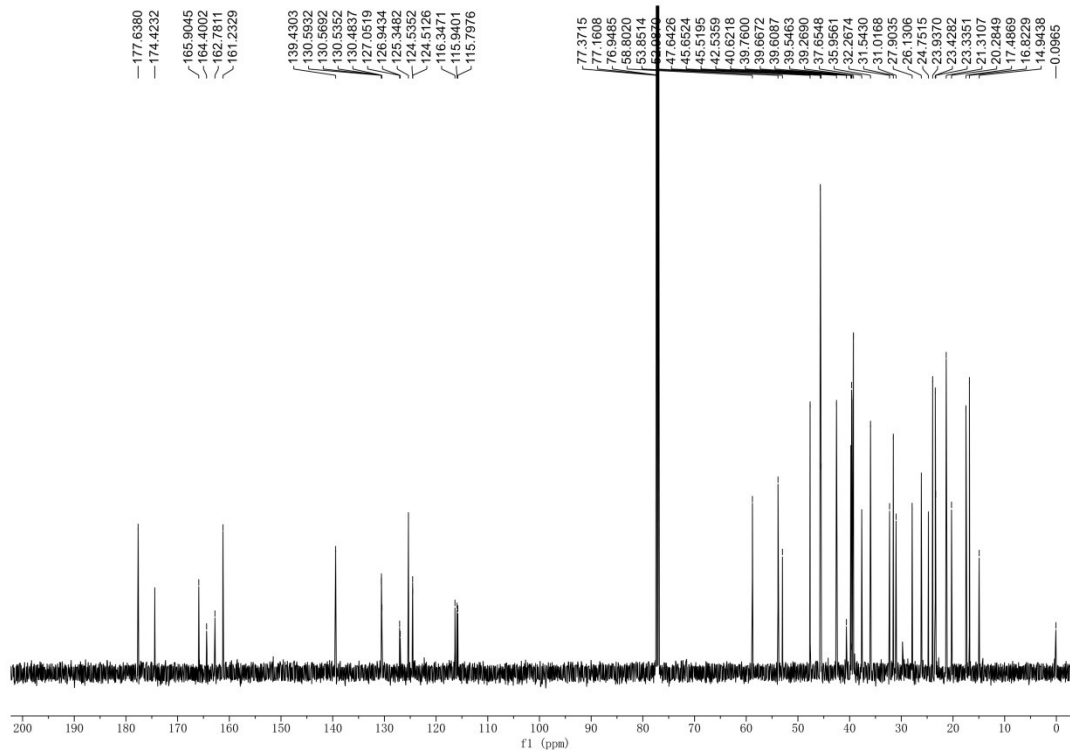

**Fig. S53.**  $^{13}\text{C}$  NMR spectrum of compound 7h (150 MHz,  $\text{CDCl}_3$ )

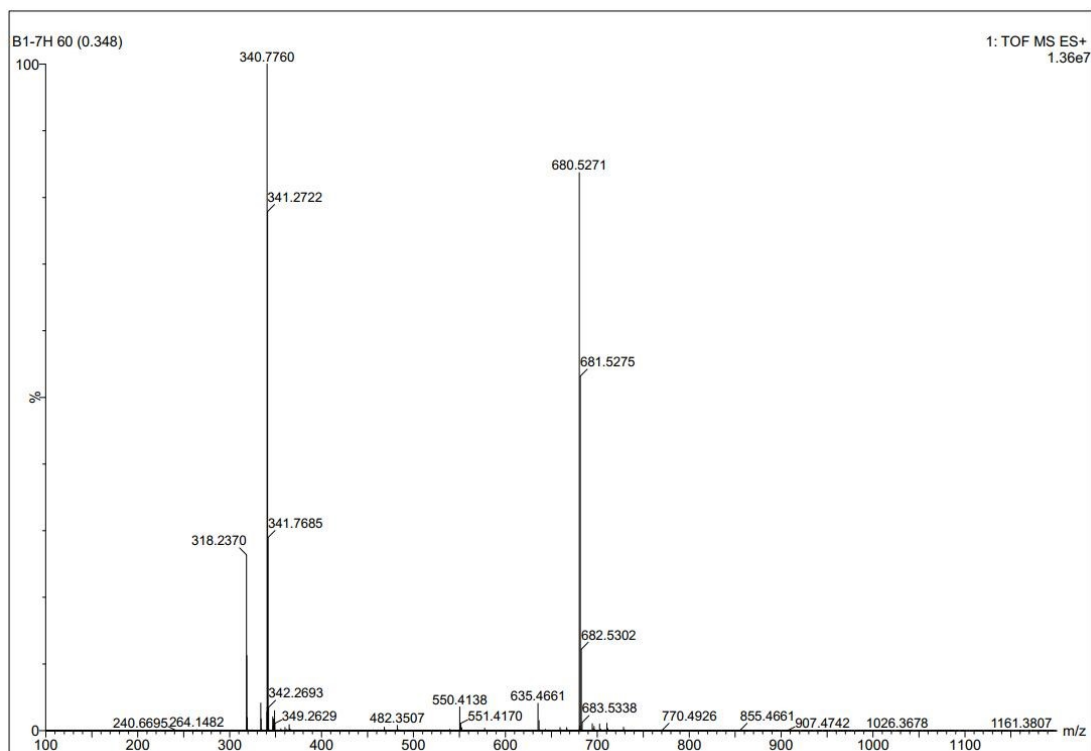

**Fig. S54.** HRMS spectrum of compound 7h

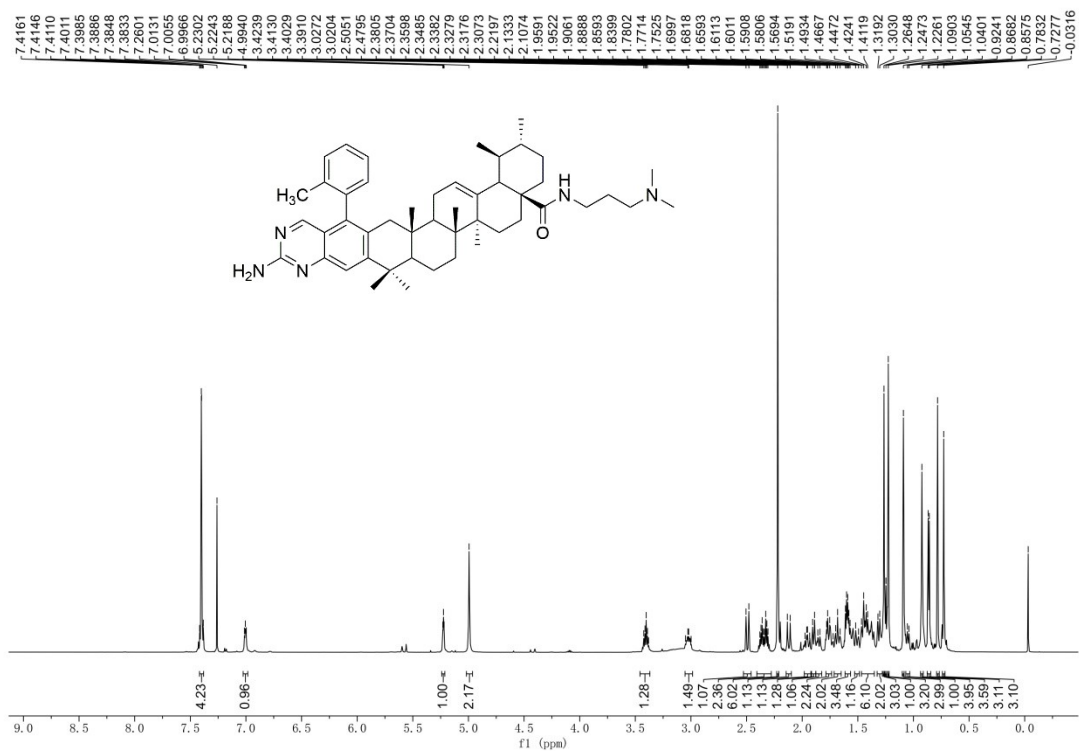

**Fig. S55.  $^1\text{H}$  NMR spectrum of compound 7i (600 MHz,  $\text{CDCl}_3$ )**

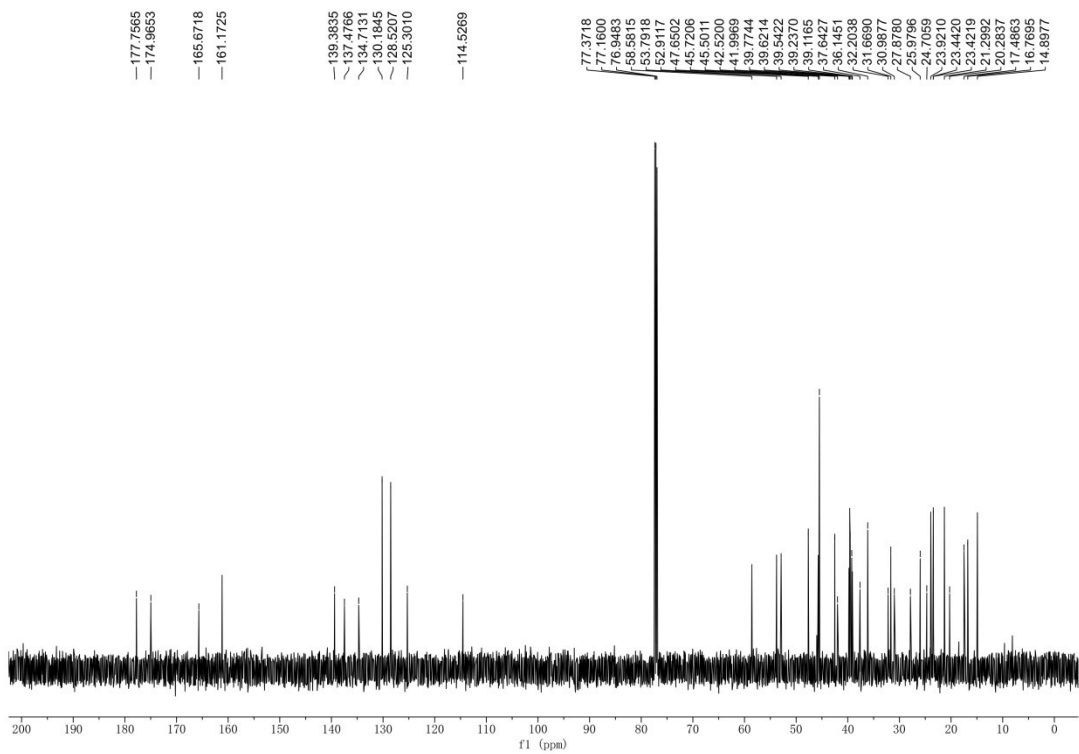

**Fig. S56.  $^{13}\text{C}$  NMR spectrum of compound 7i (150 MHz,  $\text{CDCl}_3$ )**

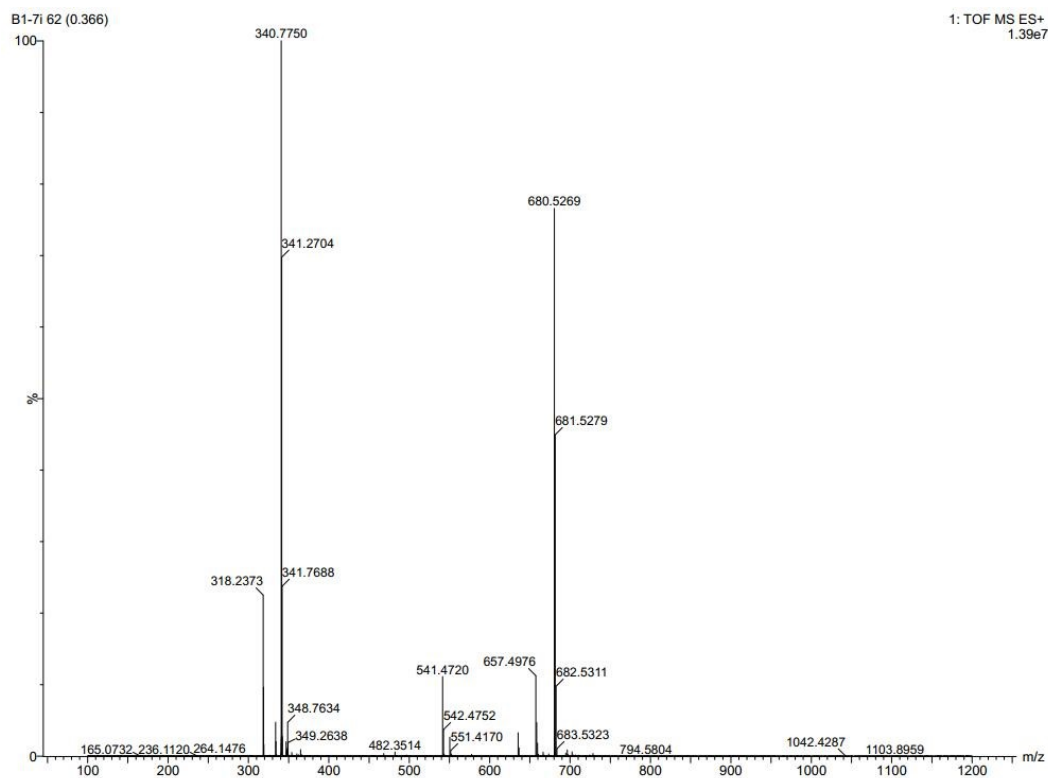

**Fig. S57. HRMS spectrum of compound 7i**

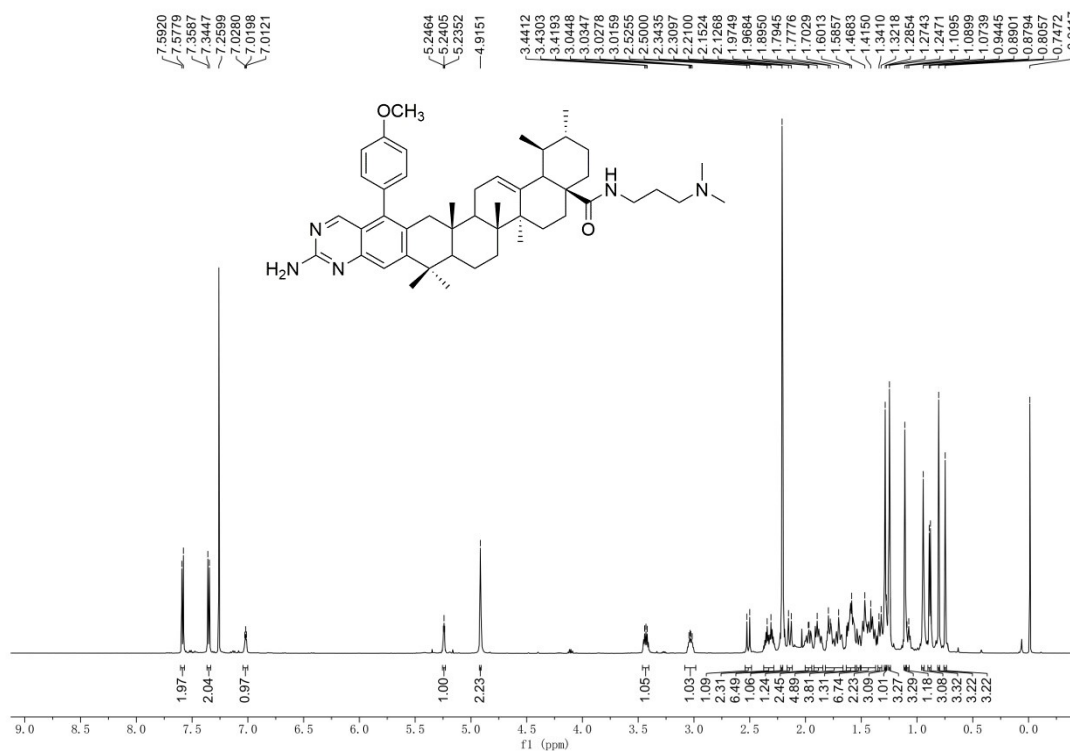

**Fig. S58. <sup>1</sup>H NMR spectrum of compound 7j (600 MHz, CDCl<sub>3</sub>)**

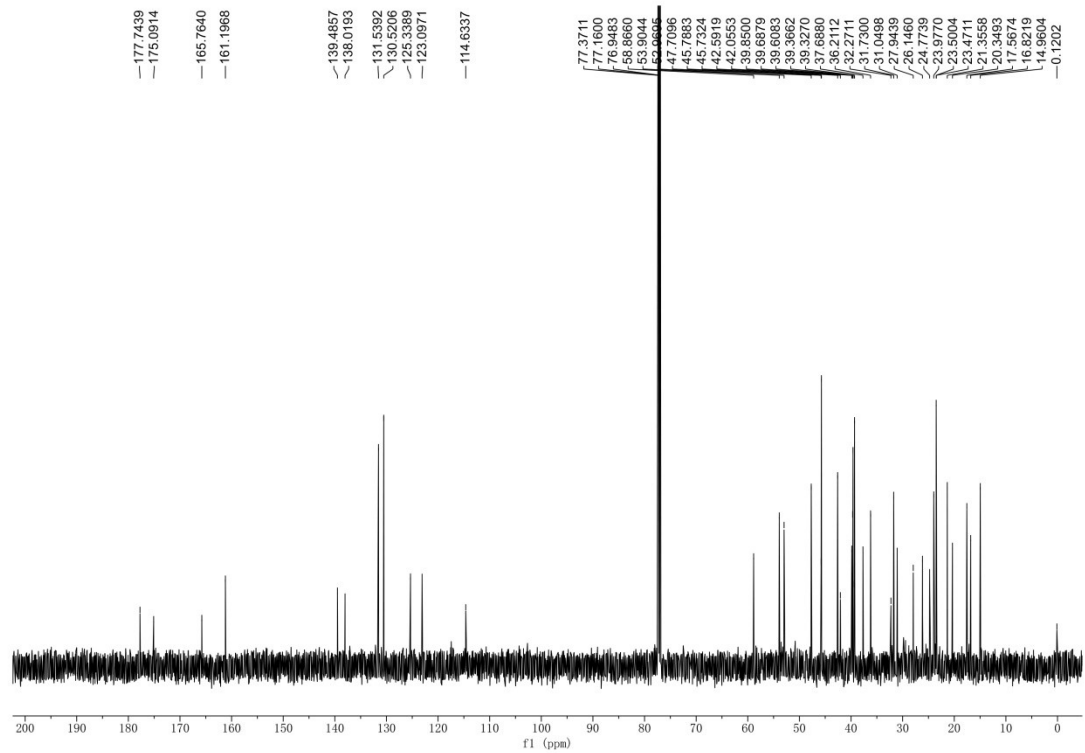

**Fig. S59.**  $^{13}\text{C}$  NMR spectrum of compound **7j** (150 MHz,  $\text{CDCl}_3$ )

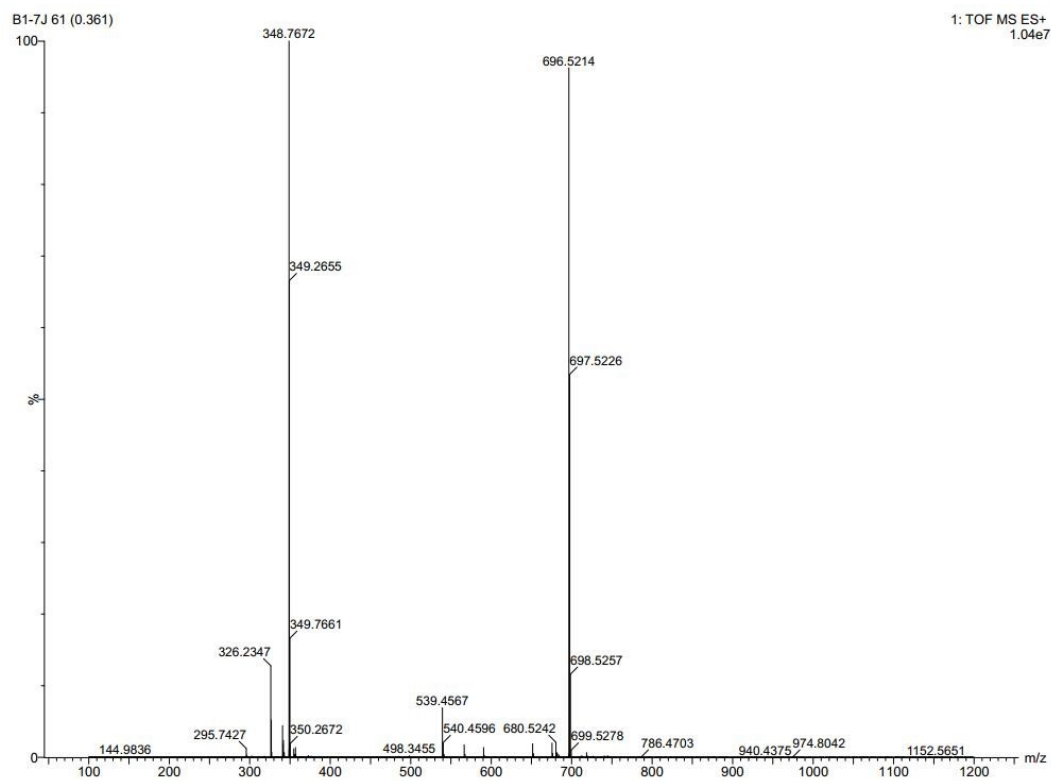

**Fig. S60.** HRMS spectrum of compound **7j**

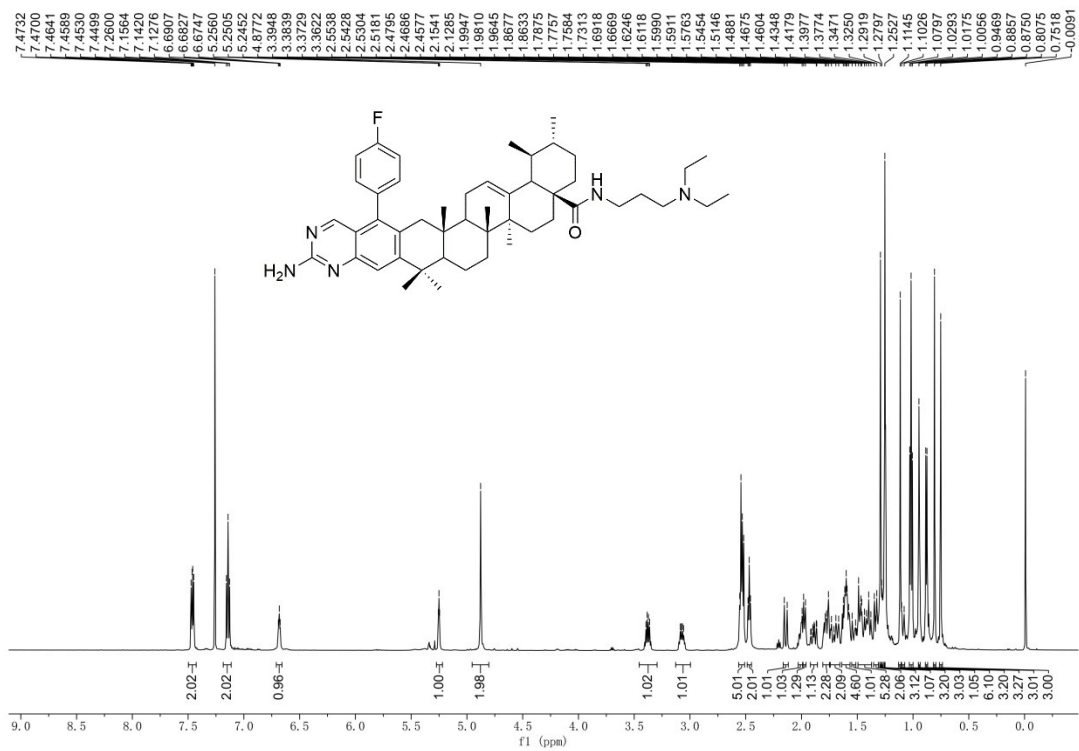

Fig. S61. <sup>1</sup>H NMR spectrum of compound 9a (600 MHz, CDCl<sub>3</sub>)

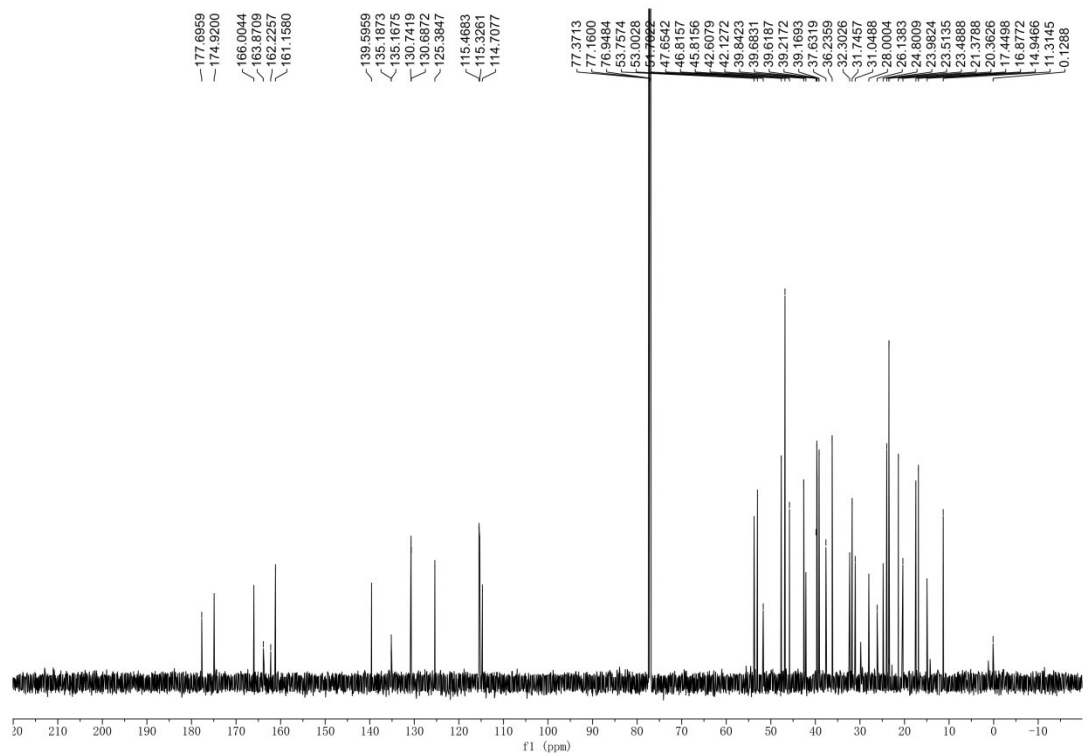

Fig. S62. <sup>13</sup>C NMR spectrum of compound 9a (150 MHz, CDCl<sub>3</sub>)



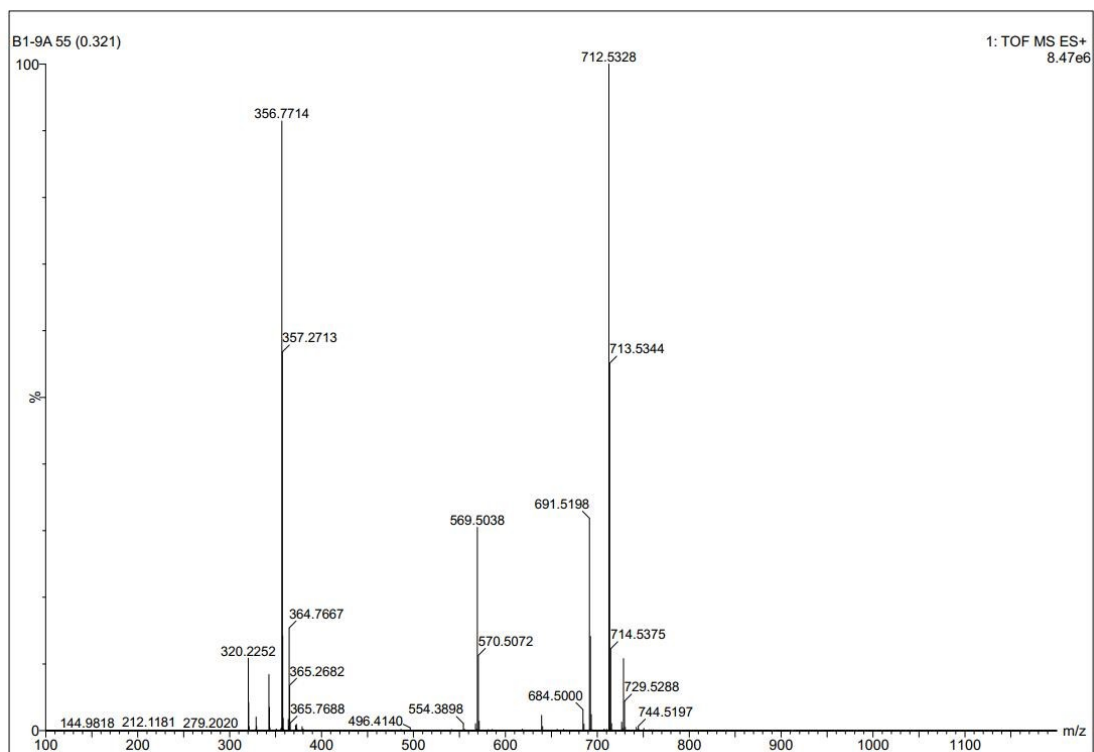

**Fig. S63.** HRMS spectrum of compound 9a

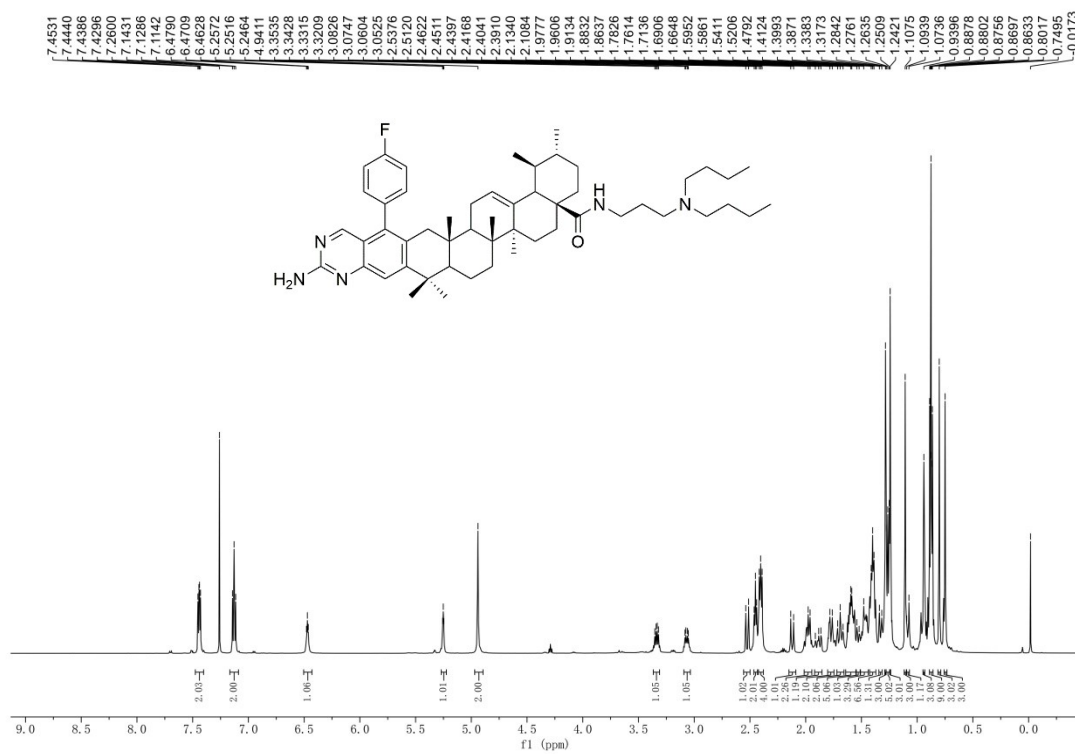

**Fig. S64.** <sup>1</sup>H NMR spectrum of compound 9b (600 MHz, CDCl<sub>3</sub>)

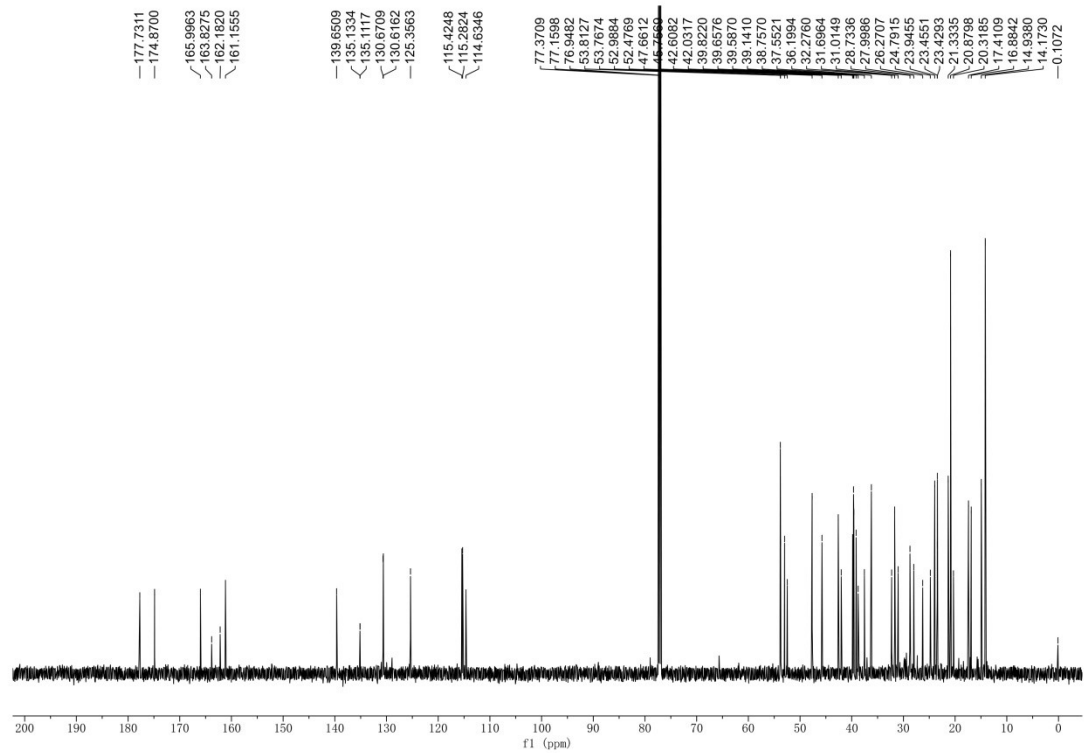

**Fig. S65.**  $^{13}\text{C}$  NMR spectrum of compound **9b** (150 MHz,  $\text{CDCl}_3$ )

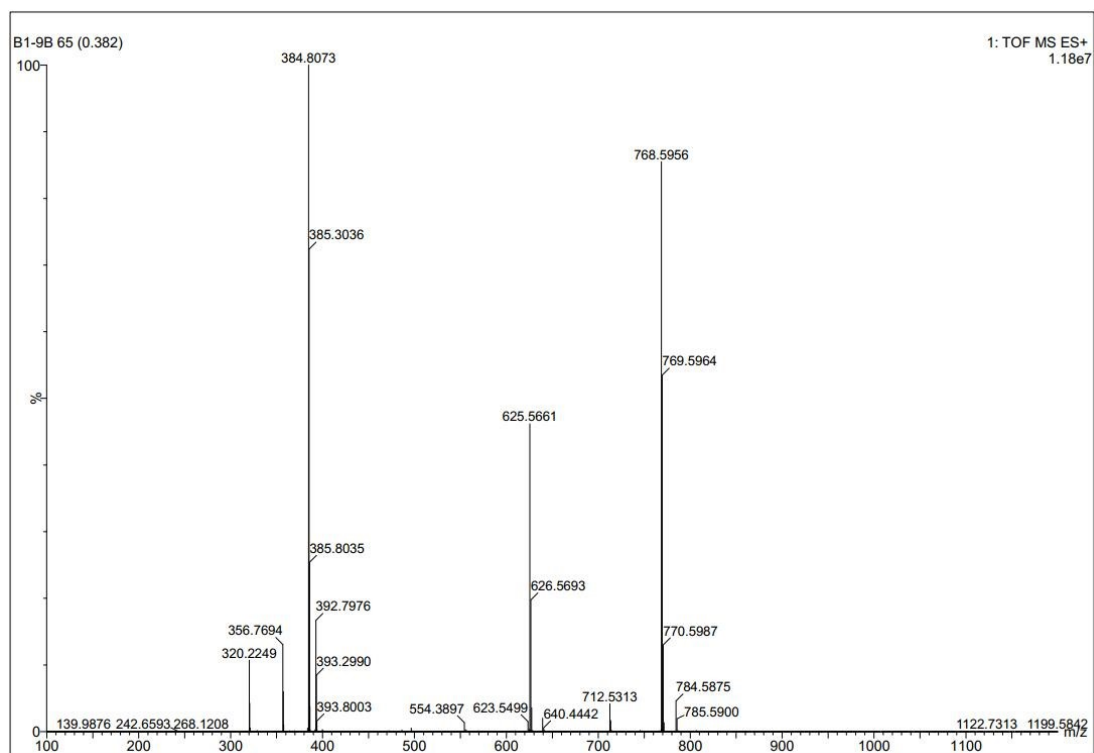

**Fig. S66.** HRMS spectrum of compound **9b**



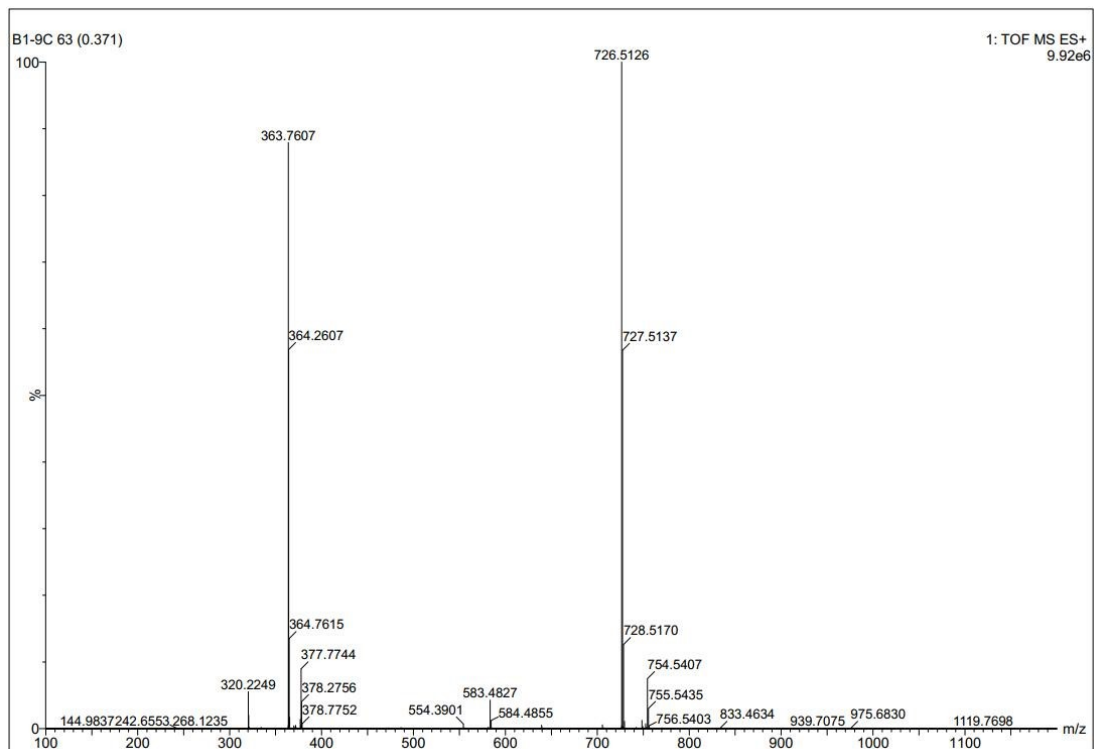

Fig. S69. HRMS spectrum of compound 9c

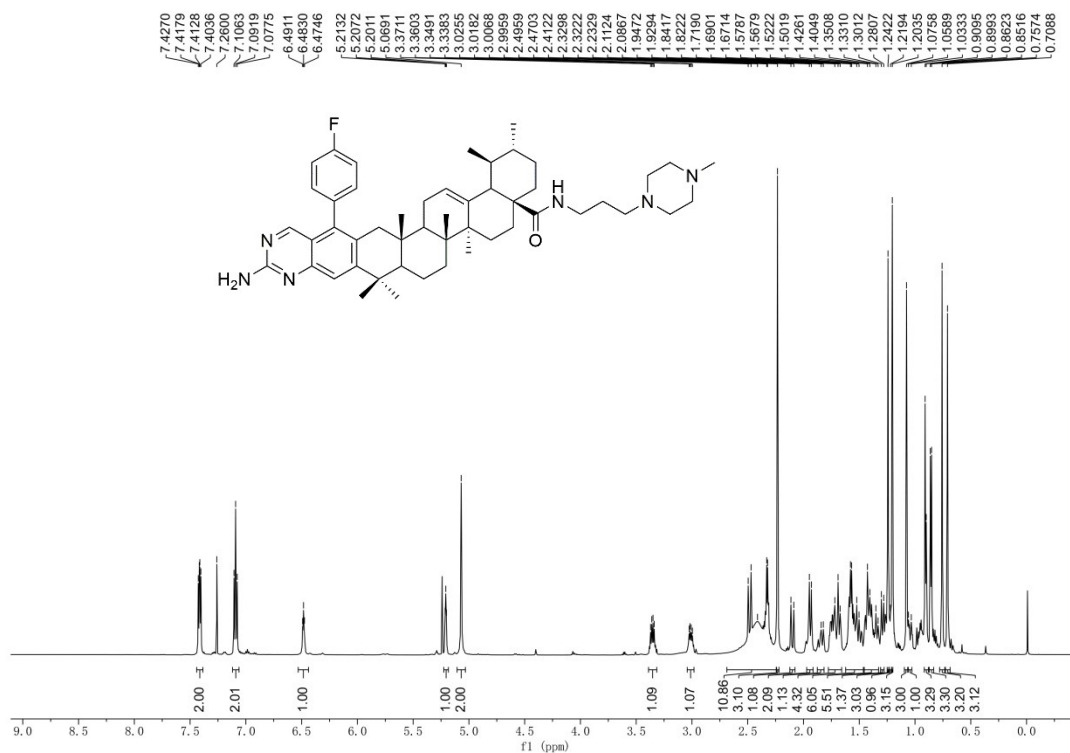

Fig. S70. <sup>1</sup>H NMR spectrum of compound 9d (600 MHz, CDCl<sub>3</sub>)

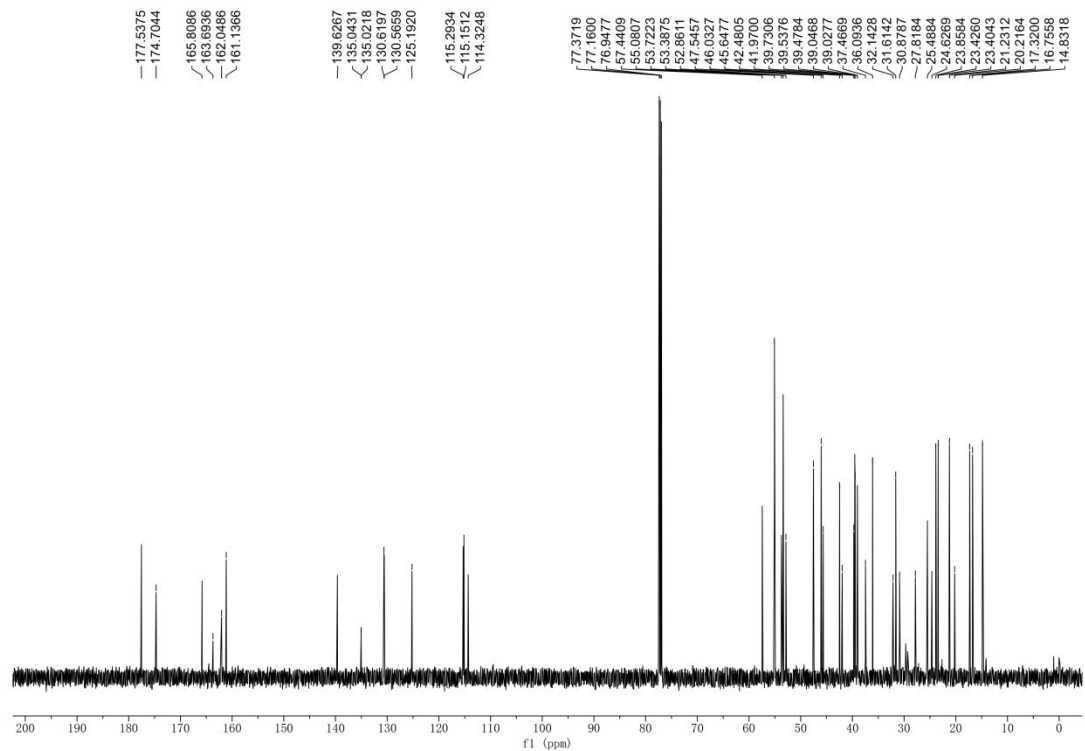

**Fig. S71.**  $^{13}\text{C}$  NMR spectrum of compound 9d (150 MHz,  $\text{CDCl}_3$ )

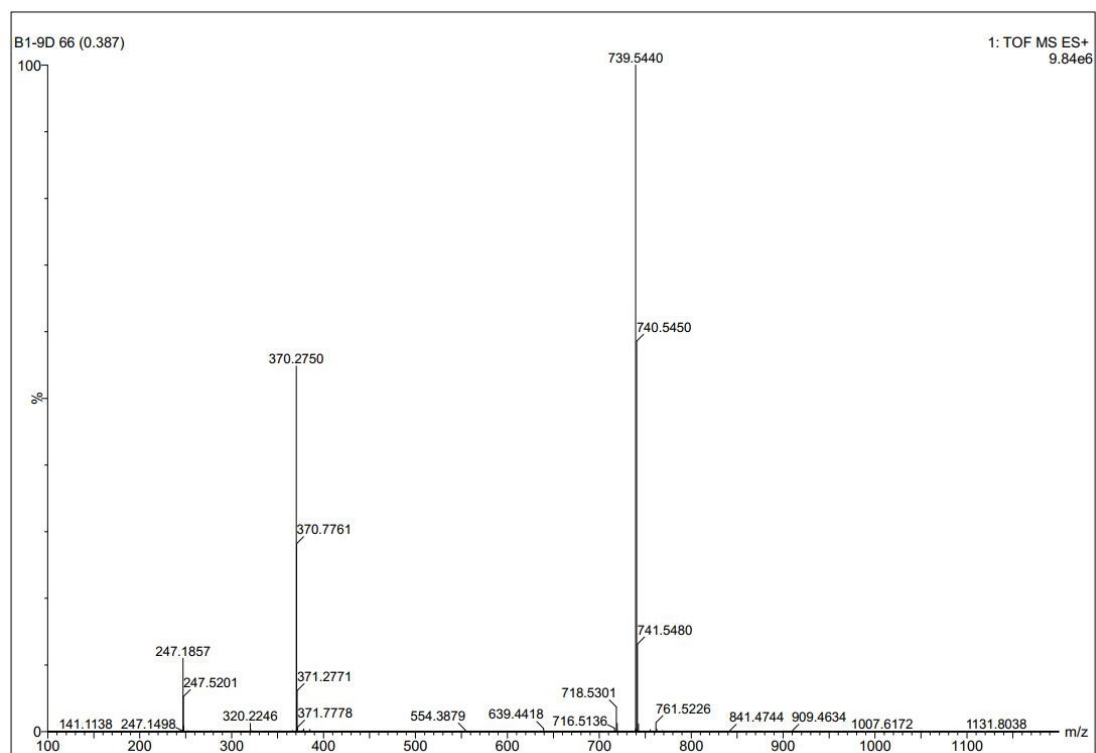

**Fig. S72.** HRMS spectrum of compound 9d

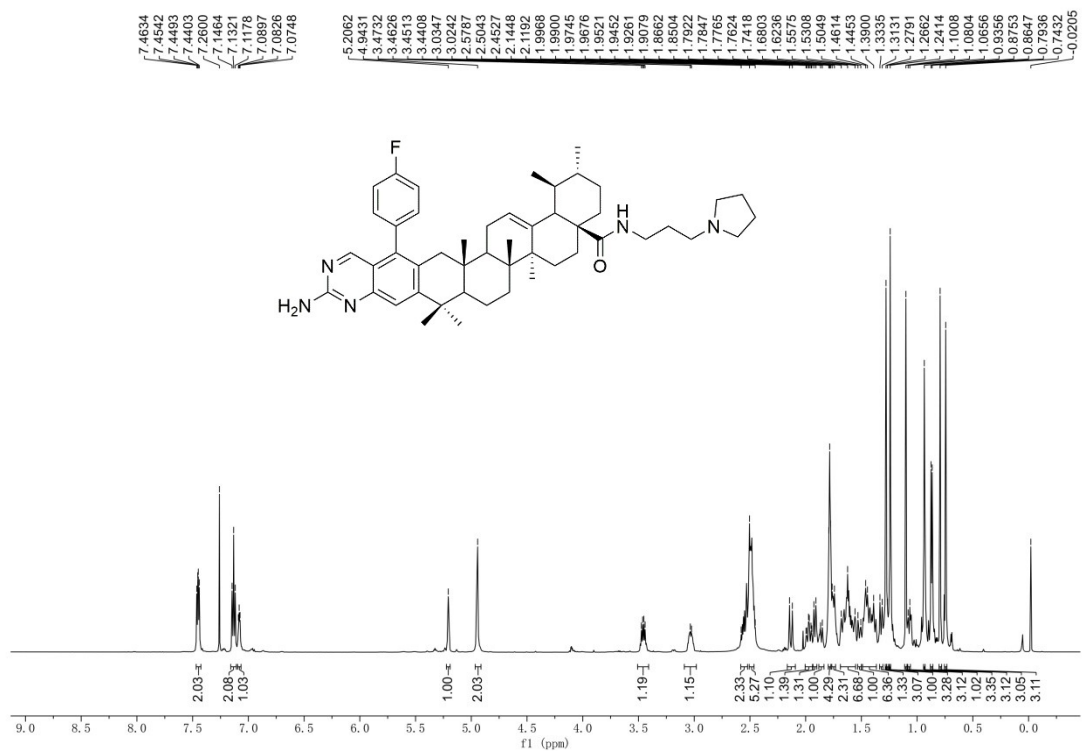

Fig. S73. <sup>1</sup>H NMR spectrum of compound 9e (600 MHz, CDCl<sub>3</sub>)

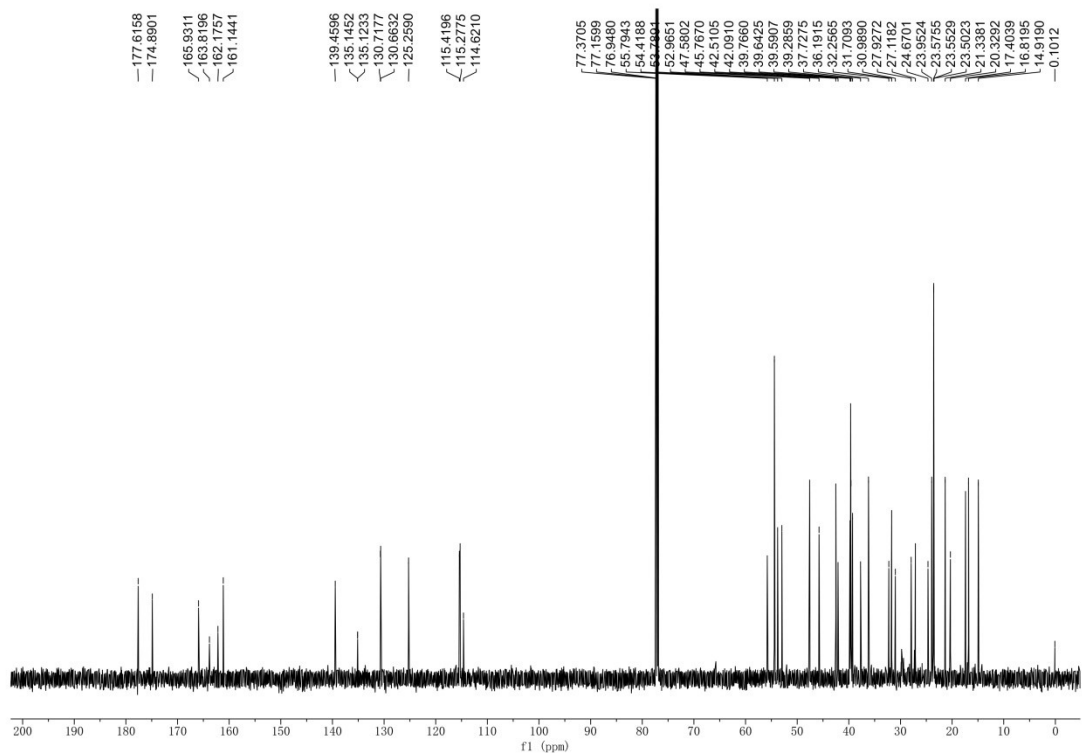

Fig. S74. <sup>13</sup>C NMR spectrum of compound 9e (150 MHz, CDCl<sub>3</sub>)

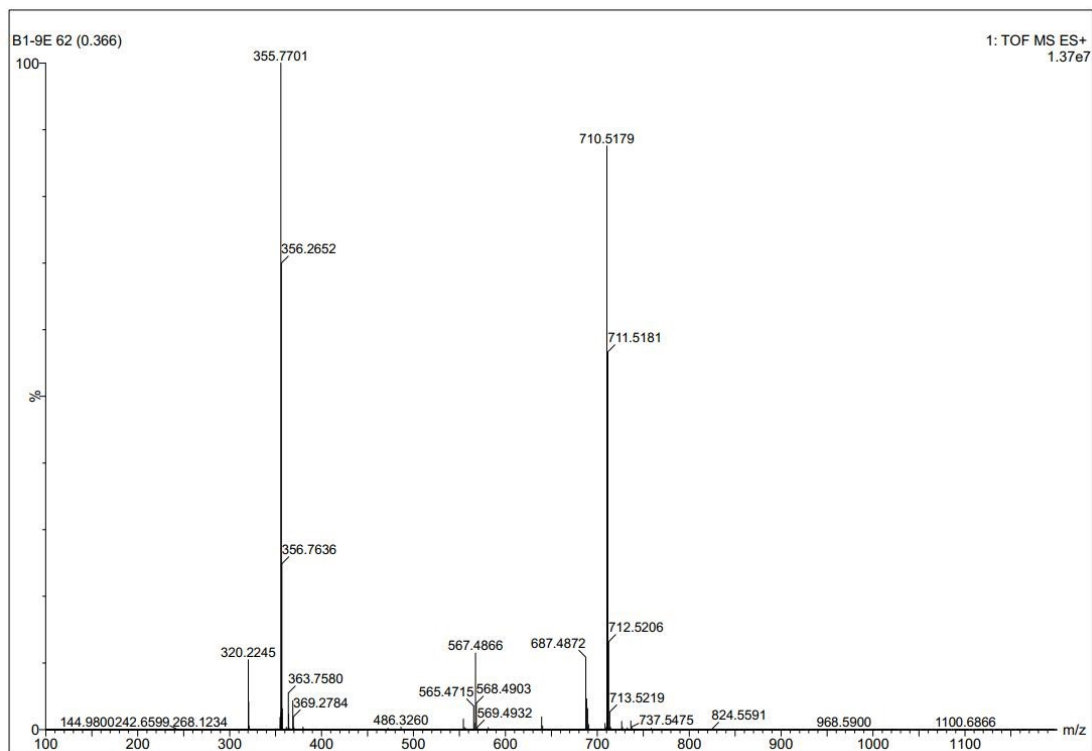

**Fig. S75.** HRMS spectrum of compound 9e

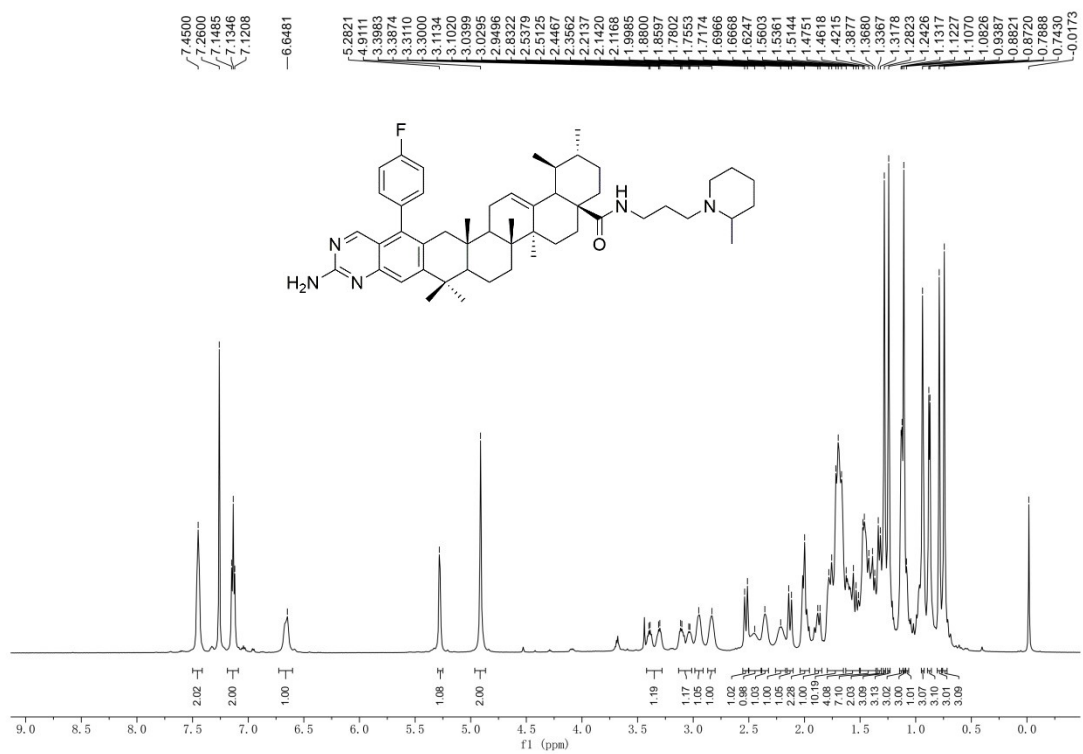

**Fig. S76.**  $^1\text{H}$  NMR spectrum of compound 9f (600 MHz,  $\text{CDCl}_3$ )

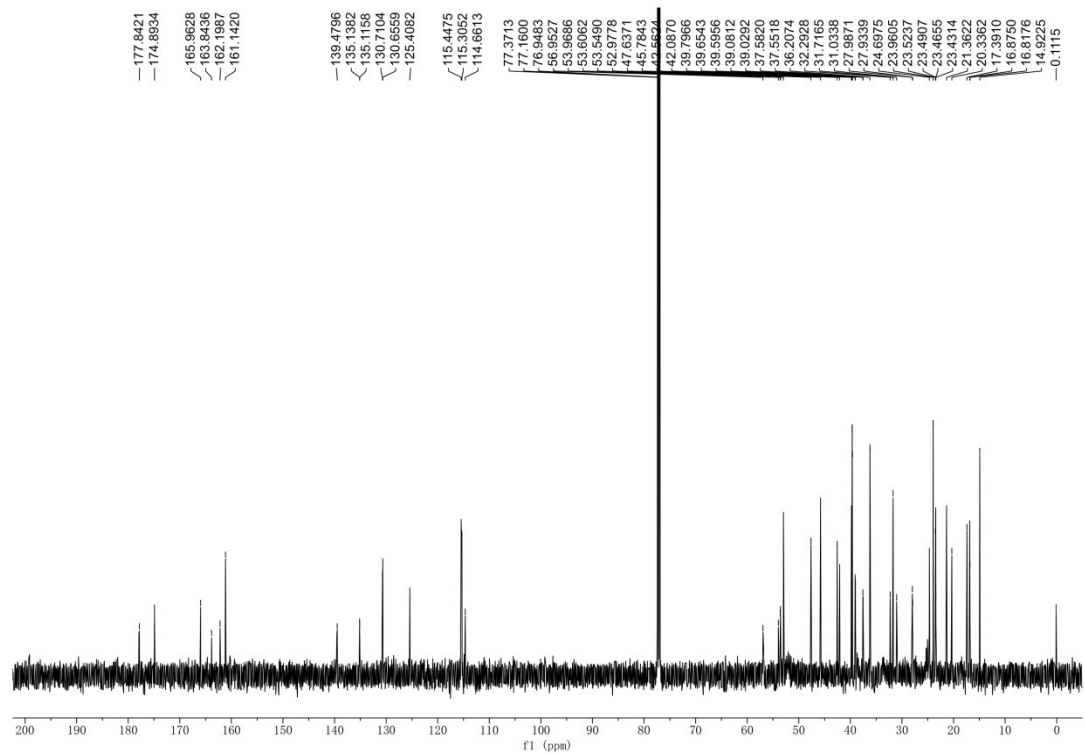

**Fig. S77.**  $^{13}\text{C}$  NMR spectrum of compound 9f (150 MHz,  $\text{CDCl}_3$ )

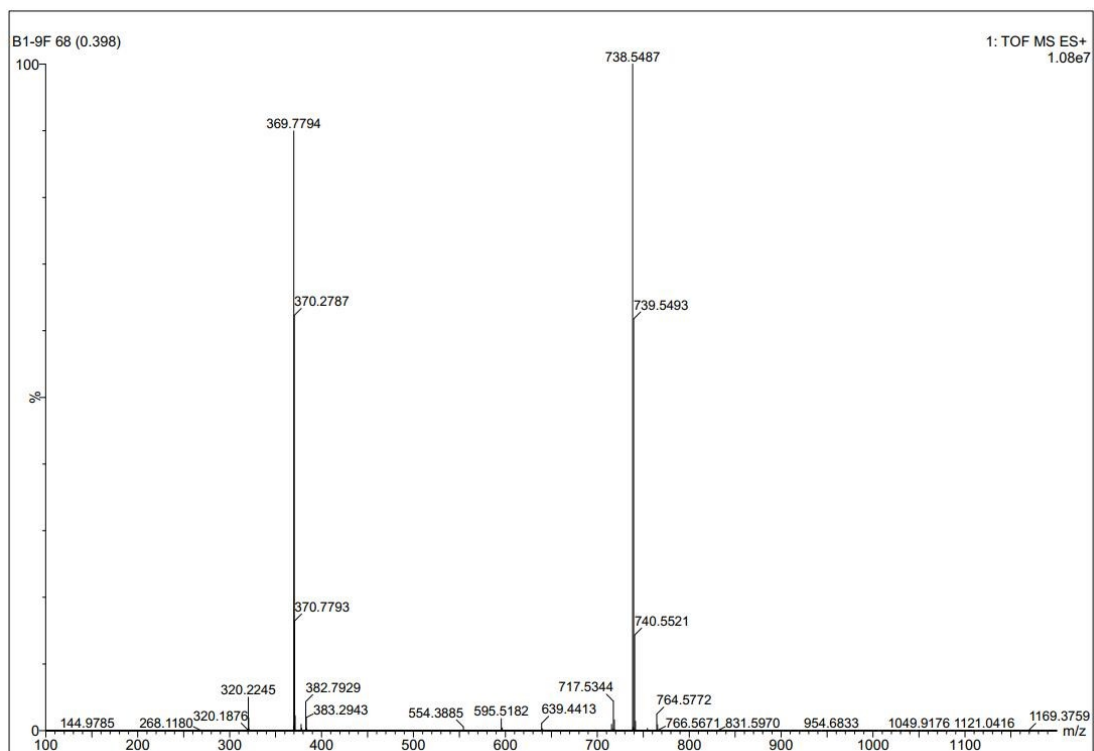

**Fig. S78.** HRMS spectrum of compound 9f
